# Supplementary material
Source: ML conference proceedings conference paper supplement (https://openreview.net/forum?id=wRJqZRxDEX)
Supplement: supplementary_material [file attachment]

## A Experimental Details

We implemented our methods using PyTorch [37] hooks and an efficient Jacobian approximate algorithm [19].

Figure 1: We generated MNIST-like inputs, where all elements are sampled from the Gaussian distribution  $\mathcal{N}(0, 1)$ .  $\mathcal{J}^{0,l}$  data was averaged over 100 different parameter-initializations. Networks were initialized with  $N_l = 1000$ . For erf plot we initialized at critical point  $(\sigma_w, \sigma_b) = (\sqrt{\frac{\pi}{4}}, 0)$ , used depth  $L = 250$  and the fitting was done with data points collected at depth  $l > 100$ ; for ReLU plot we initialized at critical point  $(\sigma_w, \sigma_b) = (\sqrt{2}, 0)$ , used depth  $L = 100$  and the fitting was done with all data points; for the  $\mu = 1$  Pre-LN plot, we initialized both networks at  $(\sigma_w, \sigma_b) = (\sqrt{2}, 0)$ , used depth  $L = 250$  and the fitting was done with  $l > 100$  data points.

Figure 2: All the phase diagrams were plotted using  $\chi_{\mathcal{J}}^{L-1}$  generated from networks with  $L = 50$  and  $N_l = 500$ . We used hooks to obtain the gradients that go into calculating  $\chi_{\mathcal{J}}^{L-1}$ .  $\chi_{\mathcal{J}}^{L-1}$  data was averaged over 100 different parameter-initializations. Inputs were generated from a normal Gaussian distribution and have dimension  $28 \times 28$ . Generating the data for the figure took approximately 2 days on Google Colab Pro (single Tesla P100 GPU).

Figure 3: In all cases, networks are trained for 10 epochs using stochastic gradient descent with CrossEntropy loss. We used the Fashion MNIST dataset [47]. All networks had depth  $L = 50$  and width  $N_l = 500$ . The learning rates were logarithmically sampled within  $(10^{-5}, 1)$ . Generating the data for the figure took approximately 12 days on Google Colab Pro (single Tesla P100 GPU).

Figure 4: (1) We made the  $\sigma_w^2 - \sigma_b^2$  phase diagram for ResNet110(LayerNorm) by averaging over 100 different parameter-initializations. The  $\sigma_w^2 - \mu$  phase diagram was made by averaging over 200 parameters initialization. (3)(4) We used SGD with momentum= 0.9 and batch size 128. For selecting the learning rate we ran a grid-search over 0.001, 0.005, 0.01, 0.02, 0.5 for 10 epochs; with weight decay  $\lambda = 10^{-4}$ . All models were trained for 50 epochs and averaged over 3 random seeds. It takes 6 GPU days in total on a single NVIDIA RTX 3090 GPU.

Figure 5: (1)(2) We made the phase diagram for MLP-Mixer with 30 blocks and averaged over 100 different parameter-initializations. (3)(4) We used network with  $L = 100$ , patch size  $4 \times 4$ , hidden size  $C = 128$ , two MLP dimensions  $N_{tm} = N_{cm} = 256$ . The  $L = 32$  point has doubled widths. All networks have 10 million parameters. Notice that for all Mixer Layers we used NTK initialization. We trained all cases on CIFAR-10 dataset using vanilla SGD paired with CSE. Batch size  $bs = 256$ , weight decay  $\lambda = 10^{-4}$  was selected from  $\{10^{-5}, 10^{-4}\}$ , mixup rate  $\alpha = 0.8$  was selected from  $\{0.4, 0.8\}$ . We also used RandAugment and horizontal flip with default settings in PyTorch. For all cases we searched learning rates within  $\{0.005, 0.01, 0.05, 0.1, 0.2, 0.5\}$ . We also tried a linear warm-up schedule for first 3000 iterations, but we did not see any improvement in performance. Generating the data for the figure took approximately 4 days on Google Colab Pro (single Tesla P100 GPU).

## B Additional Discussion on ResNet, ResNet with BatchNorm

For Convolution Layers, the NNGP kernel is a 4-index tensor:  $\mathcal{K}_{\mu\nu;ij}^l(x, x')$ , where the Greek letters  $(\mu, \nu)$  index the channels, whereas the Latin letters  $(i, j)$  index the pixels. The infinite width limit in this case is achieved by taking the number of channels to infinity (sequentially). In this limit, most of our equations for MLP can be easily rewritten using the convolutional NNGP kernel. However, in this case, the kernel is only diagonal in channel dimension:  $\mathcal{K}_{\mu\nu;ij}^l(x, x') = \mathcal{K}_{ij}^l(x, x')\delta_{\mu\nu}$ . This additional structure in the kernel makes it difficult to get a closed-form solution for  $\mathcal{J}^{l,l+1}$  in general.

**ResNet110 (LayerNorm)** In Figure 4 (2), the networks is critical close to  $\mu = 1$ , as expected from our analysis. One would naively expect the  $\mu < 1$  cases also to be critical, since for MLP with ReLU and Pre-LN,  $\sigma_b = 0$  is critical regardless of  $\sigma_w$  and  $\mu$ . However, in Figure 4(2) the region away from  $\mu = 1$  is in ordered phase. This is likely a result of the kernel  $\mathcal{K}_{\mu\nu;ij}^l(x, x')$  not being diagonal in spatial dimensions. We emphasize that the  $\mu = 1$  case stays unaffected by this, since the existence of criticality does not depend on the details of the NNGP kernel in this case. This can be readily seen from (77). We present the Numerical and training results in Figure 4.

492 **ResNet110 (BatchNorm)** The operation of BatchNorm on a preactivation (pre-BN) in an MLP can  
 493 be described as follows:

$$\begin{aligned}\tilde{h}_i(x) &= \frac{h_i(x) - \mu_{i,B}}{\sigma_{i,B}}, \\ \mu_{i,B} &= \frac{1}{|B|} \sum_{x' \in B} h_i(x') \quad \text{and} \quad \sigma_{i,B} = \sqrt{\frac{1}{|B|} \sum_{x' \in B} (h_i(x') - \mu_{i,B})^2},\end{aligned}\tag{24}$$

494 where  $B$  is the batch that  $x$  belongs to and  $|B|$  is batch size.

495 The works Yang et al. [57], He et al. [18] show that for large batch size, the effect of BatchNorm for  
 496 NNGP kernel and Jacobian Norm is deterministic. We summarize the results for the pre-BN MLP  
 497 setup:

$$\mathcal{K}^{l+1}(x, x') = \frac{\sigma_w^2}{N_l} \sum_{j=1}^{N_l} \mathbb{E}_\theta [\phi(\tilde{h}_j^l(x)) \phi(\tilde{h}_j^l(x'))] + \mu^2 \mathcal{K}^l(x, x')\tag{25}$$

$$\mathcal{J}^{l,l+1} = \frac{\sigma_w^2}{K^l(x, x) - K^l(x, x')} \mathbb{E}_\theta [\phi(\tilde{h}_j^l(x)) \phi(\tilde{h}_j^l(x))] + \mu^2,\tag{26}$$

498 where  $x'$  in the APJN term can be any  $x' \neq x$ , since for a large batch size all choices are equivalent.

499 From the above result, we can see that most results we have for LayerNorm can be translated to  
 500 BatchNorm with an easy replacement  $K^l(x, x) \rightarrow (K^l(x, x) - K^l(x, x'))$ . As a simple example,  
 501 consider a pre-BN ResNet architecture, but with all the Convolutional layers replaced with Linear  
 502 (Fully Connected) layers. For such a network, we have the following result for  $\mu < 1$ :

$$\mathcal{J}^{l,l+1} = \frac{\pi^2(1 - \mu^2)}{(\pi - 1)^2} + \mu^2.\tag{27}$$

503 For  $\mu = 1$ , we have

$$\mathcal{J}^{l,l+1} = 1 + O(l^{-1})\tag{28}$$

504 The ResNet results can then be obtained by replacing Fully Connected layers with Convolution layers,  
 505 in a similar way as discussed in ResNet(LayerNorm) section. We show the numerical results for  
 506 ResNet with BatchNorm in Figure 6.

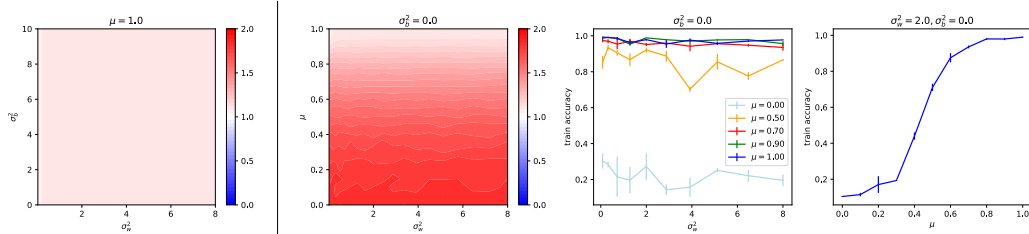

Figure 6: **ResNet110(BatchNorm)**: Left to right: (1)(2)  $\mathcal{J}^{L-1,L}$  phase diagrams, with  $(\sigma_w^2, \sigma_b^2)$  and  $(\sigma_w^2, \mu)$ . (3)(4) Training curves w.r.t  $\sigma_w^2$  and  $\mu$ .

## 507 C Technical details for Jacobians and LayerNorm

508 We will drop the dependence of  $h_i^l(x)$  on  $x$  throughout the Appendices. It should not cause any  
 509 confusion since we are *always* considering a single input.

### 510 C.1 NNGP Kernel

511 First, we derive the recurrence relation for the NNGP kernel Eq.(10). As mentioned in the main text,  
 512 weights and biases are initialized (independently) from standard normal distribution  $\mathcal{N}(0, \sigma_w^2/\text{fan\_in})$ .  
 513 We then have

$$\mathbb{E}_\theta[w_{ij}^l w_{mn}^l] = \frac{\sigma_w^2}{N_{l-1}} \delta_{im} \delta_{jn} \quad \text{and} \quad \mathbb{E}_\theta[b_i^l b_j^l] = \sigma_b^2 \delta_{ij}\tag{29}$$

514 by definition.

515 We would like to prove theorem 2.4, as a consequence of lemma 2.2. The proof of lemma 2.2 can be  
 516 found in [40].

517 *Proof of theorem 2.4.* One can prove this by definition with lemma 2.2.

$$\begin{aligned}
 \mathcal{K}^{l+1} &\equiv \frac{1}{N_{l+1}} \sum_{i=1}^{N_{l+1}} \mathbb{E}_{\theta} [h_i^{l+1} h_i^{l+1}] \\
 &= \frac{1}{N_{l+1}} \sum_{i=1}^{N_{l+1}} \mathbb{E}_{\theta} \left[ \left( \sum_{j=1}^{N_l} w_{ij}^{l+1} \phi(h_j^l) + b_i^{l+1} \right) \left( \sum_{k=1}^{N_l} w_{ik}^{l+1} \phi(h_k^l) + b_i^{l+1} \right) \right] \\
 &= \frac{1}{N_{l+1}} \sum_{i=1}^{N_{l+1}} \mathbb{E}_{\theta} \left[ \sum_{j=1}^{N_l} \sum_{k=1}^{N_l} w_{ij}^{l+1} w_{ik}^{l+1} \phi(h_j^l) \phi(h_k^l) + b_i^{l+1} b_i^{l+1} \right] \\
 &= \frac{1}{N_{l+1}} \sum_{i=1}^{N_{l+1}} \mathbb{E}_{\theta} \left[ \frac{\sigma_w^2}{N_l} \sum_{j=1}^{N_l} \phi(h_j^l) \phi(h_j^l) + \sigma_b^2 \right] \\
 &= \frac{\sigma_w^2}{N_l} \sum_{j=1}^{N_l} \mathbb{E}_{\theta} [\phi(h_j^l) \phi(h_j^l)] + \sigma_b^2. \tag{30}
 \end{aligned}$$

518

□

## 519 C.2 Jacobians

520 Next, we prove theorem 2.5 in the main text.

521 *Proof of theorem 2.5.* We start from the definition of the averaged partial Jacobian norm (APJN)  
 522 ( $l > l_0$ )

$$\begin{aligned}
 \mathcal{J}^{l_0, l+1} &\equiv \frac{1}{N_{l+1}} \mathbb{E}_{\theta} \left[ \sum_{i=1}^{N_{l+1}} \sum_{j=1}^{N_{l_0}} \frac{\partial h_i^{l+1}}{\partial h_j^{l_0}} \frac{\partial h_i^{l+1}}{\partial h_j^{l_0}} \right] \\
 &= \frac{1}{N_{l+1}} \mathbb{E}_{\theta} \left[ \sum_{i=1}^{N_{l+1}} \sum_{j=1}^{N_{l_0}} \left( \sum_{k=1}^{N_l} \frac{\partial h_i^{l+1}}{\partial h_k^l} \frac{\partial h_k^l}{\partial h_j^{l_0}} \right) \left( \sum_{m=1}^{N_l} \frac{\partial h_i^{l+1}}{\partial h_m^l} \frac{\partial h_m^l}{\partial h_j^{l_0}} \right) \right] \\
 &= \frac{1}{N_{l+1}} \mathbb{E}_{\theta} \left[ \sum_{i=1}^{N_{l+1}} \sum_{j=1}^{N_{l_0}} \sum_{k,m=1}^{N_l} (w_{ik}^{l+1} \phi'(h_k^l)) (w_{im}^{l+1} \phi'(h_m^l)) \left( \frac{\partial h_k^l}{\partial h_j^{l_0}} \frac{\partial h_m^l}{\partial h_j^{l_0}} \right) \right] \\
 &= \frac{1}{N_{l+1}} \mathbb{E}_{\theta} \left[ \sum_{i=1}^{N_{l+1}} \sum_{j=1}^{N_{l_0}} \sum_{k,m=1}^{N_l} w_{ik}^{l+1} w_{im}^{l+1} \phi'(h_k^l) \phi'(h_m^l) \frac{\partial h_k^l}{\partial h_j^{l_0}} \frac{\partial h_m^l}{\partial h_j^{l_0}} \right] \\
 &= \frac{1}{N_{l+1}} \sum_{i=1}^{N_{l+1}} \sum_{j=1}^{N_{l_0}} \sum_{k=1}^{N_l} \frac{\sigma_w^2}{N_l} \mathbb{E}_{\theta} \left[ \phi'(h_k^l) \phi'(h_k^l) \frac{\partial h_k^l}{\partial h_j^{l_0}} \frac{\partial h_k^l}{\partial h_j^{l_0}} \right] \\
 &= \frac{\sigma_w^2}{N_l} \sum_{k=1}^{N_l} \mathbb{E}_{\theta} \left[ \phi'(h_k^l) \phi'(h_k^l) \left( \sum_{j=1}^{N_{l_0}} \frac{\partial h_k^l}{\partial h_j^{l_0}} \frac{\partial h_k^l}{\partial h_j^{l_0}} \right) \right]. \tag{31}
 \end{aligned}$$

523 where we used chain rule and took expectation value over  $w^{l+1}$ . Next we take chain rule again:

$$\begin{aligned}
\mathcal{J}^{l_0, l+1} &= \frac{\sigma_w^2}{N_l} \sum_{k=1}^{N_l} \mathbb{E}_\theta \left[ \phi'(h_k^l) \phi'(h_k^l) \left( \sum_{j=1}^{N_{l_0}} \sum_{m,n=1}^{N_{l-1}} w_{km}^l w_{kn}^l \phi'(h_m^{l-1}) \phi'(h_n^{l-1}) \frac{\partial h_m^{l-1}}{\partial h_j^{l_0}} \frac{\partial h_n^{l-1}}{\partial h_j^{l_0}} \right) \right] \\
&= \frac{\sigma_w^4}{N_l N_{l-1}} \sum_{k=1}^{N_l} \mathbb{E}_\theta \left[ \phi'(h_k^l) \phi'(h_k^l) \left( \sum_{j=1}^{N_{l_0}} \sum_{m=1}^{N_{l-1}} \phi'(h_m^{l-1}) \phi'(h_m^{l-1}) \frac{\partial h_m^{l-1}}{\partial h_j^{l_0}} \frac{\partial h_m^{l-1}}{\partial h_j^{l_0}} \right) + O(1/N_{l-1}) \right] \\
&= \frac{\sigma_w^4}{N_l N_{l-1}} \sum_{k=1}^{N_l} \mathbb{E}_\theta [\phi'(h_k^l) \phi'(h_k^l)] \mathbb{E}_\theta \left[ \left( \sum_{j=1}^{N_{l_0}} \sum_{m=1}^{N_{l-1}} \phi'(h_m^{l-1}) \phi'(h_m^{l-1}) \frac{\partial h_m^{l-1}}{\partial h_j^{l_0}} \frac{\partial h_m^{l-1}}{\partial h_j^{l_0}} \right) \right] \\
&= \frac{\sigma_w^2}{N_l} \sum_{k=1}^{N_l} \mathbb{E}_\theta [\phi'(h_k^l) \phi'(h_k^l)] \cdot \frac{\sigma_w^2}{N_{l-1}} \mathbb{E}_\theta \left[ \left( \sum_{j=1}^{N_{l_0}} \sum_{m=1}^{N_{l-1}} \phi'(h_m^{l-1}) \phi'(h_m^{l-1}) \frac{\partial h_m^{l-1}}{\partial h_j^{l_0}} \frac{\partial h_m^{l-1}}{\partial h_j^{l_0}} \right) \right] \\
&= \chi_{\mathcal{J}}^l \mathcal{J}^{l_0, l}, \tag{32}
\end{aligned}$$

524 where we integrate (by parts) over  $w^l$  to get the second line. We take  $N_{l-1} \rightarrow \infty$  and then  $N_l \rightarrow \infty$   
525 to get the third line. We rearrange terms and use the Eq.(12) to get the fourth and fifth lines. Notice that  
526 to get the third line we used the fact in the infinite width limit, the distribution of  $h_i^l$  is independent of  
527  $h_i^{l-1}$ . Thus we proved

$$\mathcal{J}^{l_0, l+1} = \chi_{\mathcal{J}}^l \mathcal{J}^{l_0, l}. \tag{33}$$

528

□

529 The critical line is defined by requiring  $\chi_{\mathcal{J}}^* = 1$ , where critical points are reached by further requiring  
530  $\chi_{\mathcal{K}}^* = 1$ .

531 As we mentioned in main text,  $l_0 = 0$  is subtle since the input dimension is fixed  $N_0$ , which can not  
532 be assumed to be infinity. Even though for dataset like MNIST, usually  $N_0$  is not significantly smaller  
533 than width  $N_l$ . We show how to take finite  $O(N_0^{-1})$  correction into account by using one example.

534 **Lemma C.1.** Consider a one hidden layer network with a finite input dimension  $N_0$ . In the infinite  
535 width limit, the APJN is still deterministic and the first step of the recurrence relation is modified to:

$$\mathcal{J}^{0,2} = \left( \chi_{\mathcal{J}}^1 + \frac{2\sigma_w^2}{N_0} \chi_{\Delta}^1 \sum_k \frac{1}{N_0} h_k^0 h_k^0 \right) \mathcal{J}^{0,1}, \tag{34}$$

536 where  $\mathcal{J}^{0,1} = \sigma_w^2$ .

*Proof.*

$$\begin{aligned}
\mathcal{J}^{0,2} &= \frac{1}{N_2} \mathbb{E}_\theta \left[ \sum_{i=1}^{N_2} \sum_{j=1}^{N_0} \frac{\partial h_i^2}{\partial h_j^0} \frac{\partial h_i^2}{\partial h_j^0} \right] \\
&= \frac{1}{N_2} \mathbb{E}_\theta \left[ \sum_{i=1}^{N_2} \sum_{j=1}^{N_0} \sum_{k,m=1}^{N_1} w_{ik}^2 w_{im}^2 \phi'(h_k^1) \phi'(h_m^1) \frac{\partial h_k^1}{\partial h_j^0} \frac{\partial h_m^1}{\partial h_j^0} \right] \\
&= \frac{1}{N_2} \sum_{i=1}^{N_2} \sum_{j=1}^{N_0} \sum_{k,m=1}^{N_1} \mathbb{E}_\theta [w_{ik}^2 w_{im}^2 w_{kj}^1 w_{mj}^1 \phi'(h_k^1) \phi'(h_m^1)] \\
&= \sum_{j=1}^{N_0} \sum_{k=1}^{N_1} \frac{\sigma_w^2}{N_1} \mathbb{E}_\theta [w_{kj}^1 w_{kj}^1 \phi'(h_k^1) \phi'(h_k^1)] \\
&= \sigma_w^2 \left( \chi_{\mathcal{J}}^1 + \frac{2\sigma_w^2}{N_0} \chi_{\Delta}^1 \sum_k^{N_0} \frac{1}{N_0} h_k^0 h_k^0 \right) \\
&= \left( \chi_{\mathcal{J}}^1 + \frac{2\sigma_w^2}{N_0} \chi_{\Delta}^1 \sum_k^{N_0} \frac{1}{N_0} h_k^0 h_k^0 \right) \mathcal{J}^{0,1}, \tag{35}
\end{aligned}$$

537 where to get the result we used integrate by parts, then explicitly integrated over  $w_{ij}^1$ . We have  
538 introduced a coefficient of finite width corrections,  $\chi_{\Delta}^l$ , defined follows.  $\square$

**Definition C.2** (Coefficient of Finite Width Corrections).

$$\chi_{\Delta}^l = \frac{\sigma_w^2}{N_l} \sum_{i=1}^{N_l} \mathbb{E}_\theta [\phi''(h_i^l) \phi''(h_i^l) + \phi'''(h_i^l) \phi'(h_i^l)]. \tag{36}$$

539 *Remark C.3.* Notice that the correction to  $\mathcal{J}^{0,2}$  is order  $O(N_0^{-1})$ . If one calculate the recurrence  
540 relation for deeper layers, the correction to  $\mathcal{J}^{0,l}$  will be  $O(\sum_{l'=0}^l N_{l'}^{-1})$ , which means the contribution  
541 from hidden layers can be ignored in infinite width limit.

542 The  $\mathcal{J}^{0,2}$  example justifies the factorization of the integral when we go from the last line of Eq.(31)  
543 to Eq.(33).

544 Finally, the full Jacobian in infinite width limit can be written as

545 **Lemma C.4** (APJN with  $l_0 = 0$ ). *The APJN (with  $l_0 = 0$ ) of a given network can be written as*

$$\mathcal{J}^{0,l} = \sigma_w^2 \left( \chi_{\mathcal{J}}^1 + \frac{2\sigma_w^2}{N_0} \chi_{\Delta}^1 \sum_k^{N_0} \frac{1}{N_0} h_k^0 h_k^0 \right) \prod_{l'=2}^{l-1} \chi_{\mathcal{J}}^{l'}. \tag{37}$$

546 *Note that APJN with  $l_0 > 0$  does not receive the  $O(N_0^{-1})$  correction.*

### 547 C.3 APJN and gradients

548 As mentioned in the main text, APJN is an important tool in studying the exploding and vanishing  
549 gradients problem. Its utility stems from the fact that it is a dominant factor in the norm of the  
550 gradients. This can be readily by looking at the (squared)  $L_2$  norm of the gradient of any flattened

parameter matrix  $\theta^l$ , at initialization. In the infinite width limit, one gets

$$\begin{aligned}
\|\nabla_{\theta^l} \mathcal{L}\|_2^2 &= \left( \sum_{all} \frac{\partial \mathcal{L}}{\partial h_i^L} \frac{\partial h_i^L}{\partial h_j^{L-1}} \cdots \frac{\partial h_k^{l+1}}{\partial h_m^l} \frac{\partial h_m^l}{\partial \theta_n^l} \right)^2 \\
&= \sum_{all} \left( \frac{\partial \mathcal{L}}{\partial h_i^L} \frac{\partial \mathcal{L}}{\partial h_{i'}^L} \right) \left( \frac{\partial h_i^L}{\partial h_j^{L-1}} \frac{\partial h_{i'}^L}{\partial h_{j'}^{L-1}} \right) \cdots \left( \frac{\partial h_k^{l+1}}{\partial h_m^l} \frac{\partial h_{k'}^{l+1}}{\partial h_{m'}^l} \right) \left( \frac{\partial h_m^l}{\partial \theta_n^l} \frac{\partial h_{m'}^l}{\partial \theta_n^l} \right) \\
&= \sum_{all} \left( \frac{\partial \mathcal{L}}{\partial h_i^L} \frac{\partial \mathcal{L}}{\partial h_{i'}^L} \right) \left( \frac{\partial h_i^L}{\partial h_j^{L-1}} \frac{\partial h_{i'}^L}{\partial h_{j'}^{L-1}} \right) \cdots \left( \frac{\partial h_k^{l+1}}{\partial h_m^l} \frac{\partial h_{k'}^{l+1}}{\partial h_{m'}^l} \right) \delta_{mm'} \left\| \frac{\partial h^l}{\partial \theta^l} \right\|_F^2 \\
&= \sum_{all} \left( \frac{\partial \mathcal{L}}{\partial h_i^L} \frac{\partial \mathcal{L}}{\partial h_{i'}^L} \right) \left( \frac{\partial h_i^L}{\partial h_j^{L-1}} \frac{\partial h_{i'}^L}{\partial h_{j'}^{L-1}} \right) \cdots \delta_{kk'} \mathcal{J}^{l,l+1} \left\| \frac{\partial h^l}{\partial \theta^l} \right\|_F^2 \\
&= \sum_{i,i',j,j'} \left( \frac{\partial \mathcal{L}}{\partial h_i^L} \frac{\partial \mathcal{L}}{\partial h_{i'}^L} \right) \left( \frac{\partial h_i^L}{\partial h_j^{L-1}} \frac{\partial h_{i'}^L}{\partial h_{j'}^{L-1}} \right) \delta_{jj'} \cdots \mathcal{J}^{l,l+1} \left\| \frac{\partial h^l}{\partial \theta^l} \right\|_F^2 \\
&= \sum_{i,i'} \left( \frac{\partial \mathcal{L}}{\partial h_i^L} \frac{\partial \mathcal{L}}{\partial h_{i'}^L} \right) \delta_{ii'} \mathcal{J}^{L-1,L} \cdots \mathcal{J}^{l,l+1} \left\| \frac{\partial h^l}{\partial \theta^l} \right\|_F^2 \\
&= \left\| \frac{\partial \mathcal{L}}{\partial h^L} \right\|_2^2 \mathcal{J}^{L-1,L} \cdots \mathcal{J}^{l,l+1} \left\| \frac{\partial h^l}{\partial \theta^l} \right\|_F^2 \\
&= \left\| \frac{\partial \mathcal{L}}{\partial h^L} \right\|_2^2 \mathcal{J}^{l,L} \left\| \frac{\partial h^l}{\partial \theta^l} \right\|_F^2, \tag{38}
\end{aligned}$$

where  $\|\cdot\|_2$  denotes the  $L_2$  norm and  $\|\cdot\|_F$  denotes the Frobenius norm.

#### C.4 LayerNorm on Pre-activations

**Definition C.5** (Layer Normalization).

$$\tilde{h}_i^l = \frac{h_i^l - \mathbb{E}[h^l]}{\sqrt{\mathbb{E}[(h^l)^2] - \mathbb{E}[h^l]^2}} \gamma_i^l + \beta_i^l, \tag{39}$$

where  $\gamma_i^l$  and  $\beta_i^l$  are learnable parameters.

**Remark C.6.** With only LayerNorm, the (1) is simplified to

$$h_i^{l+1} = \sum_{j=1}^{N_l} w_{ij}^{l+1} \phi(\tilde{h}_j^l) + b_i^{l+1}. \tag{40}$$

**Remark C.7.** In the limit of infinite width, using the law of large numbers, the average over neurons  $\mathbb{E}[\cdots]$  can be replaced by the average of parameter-initializations  $\mathbb{E}_\theta[\cdots]$ . Additionally, in this limit, the preactivations are i.i.d. Gaussian distributed:  $h^l \sim \mathcal{N}(0, \mathcal{K}^l)$ .

$$\mathbb{E}[h^l] = \mathbb{E}_\theta[h^l] = 0, \tag{41}$$

$$\mathbb{E}[(h^l)^2] = \mathbb{E}_\theta[(h^l)^2] = \mathcal{K}^l. \tag{42}$$

The normalized preactivation then simplifies to the form of Eq.(20).

**Remark C.8.** At initialization, the parameters  $\gamma_i^l$  and  $\beta_i^l$  take the values 1 and 0, respectively. This leads to the form in equation (20). In infinite width limit it has the following form

$$\tilde{h}_i^l = \frac{h_i^l - \mathbb{E}_\theta[h^l]}{\sqrt{\mathbb{E}_\theta[(h^l)^2] - \mathbb{E}_\theta[h^l]^2}}. \tag{43}$$

**Lemma C.9.** With LayerNorm on preactivations, the gaussian average is modified to

$$\mathbb{E}_\theta[O(\tilde{h}_i^l)] = \frac{1}{\sqrt{2\pi}} \int d\tilde{h}_i^l O(\tilde{h}_i^l) e^{-\frac{(\tilde{h}_i^l)^2}{2}}. \tag{44}$$

563 *Proof.* By definition  $\tilde{h}_i^l$  is sampled from a standard normal distribution  $\mathcal{N}(0, 1)$ , then use lemma 2.2  
 564 to get the final form.  $\square$

565 **Theorem C.10.** *In the infinite width limit the recurrence relation for the NNGP kernel with Layer-*  
 566 *Norm on preactivations is*

$$\mathcal{K}^{l+1} = \frac{\sigma_w^2}{N_l} \sum_{j=1}^{N_l} \mathbb{E}_\theta \left[ \phi(\tilde{h}_j^l) \phi(\tilde{h}_j^l) \right] + \sigma_b^2. \quad (45)$$

*Proof.*

$$\begin{aligned} \mathcal{K}^{l+1} &= \frac{1}{N_{l+1}} \sum_{i=1}^{N_{l+1}} \mathbb{E}_\theta [h_i^{l+1} h_i^{l+1}] \\ &= \frac{1}{N_{l+1}} \sum_{i=1}^{N_{l+1}} \mathbb{E}_\theta \left[ \left( \sum_{j=1}^{N_l} w_{ij}^{l+1} \phi(\tilde{h}_j^l) + b_i^{l+1} \right) \left( \sum_{k=1}^{N_l} w_{ik}^{l+1} \phi(\tilde{h}_k^l) + b_i^{l+1} \right) \right] \\ &= \frac{\sigma_w^2}{N_l} \sum_{j=1}^{N_l} \mathbb{E}_\theta \left[ \phi(\tilde{h}_j^l) \phi(\tilde{h}_j^l) \right] + \sigma_b^2. \end{aligned} \quad (46)$$

567  $\square$

568 **Theorem C.11.** *In the infinite width limit the recurrence relation for partial Jacobian with LayerNorm*  
 569 *on preactivations is*

$$\mathcal{J}^{l_0, l+1} = \chi_{\mathcal{J}}^l \mathcal{J}^{l_0, l}, \quad (47)$$

570 where  $\chi_{\mathcal{J}}^l = \frac{\sigma_w^2}{N_l \mathcal{K}^l} \sum_{i=1}^{N_l} \mathbb{E}_\theta \left[ \phi'(\tilde{h}_i^l)^2 \right]$ .

*Proof.*

$$\begin{aligned} \mathcal{J}^{l_0, l+1} &= \frac{1}{N_{l+1}} \mathbb{E}_\theta \left[ \sum_{i=1}^{N_{l+1}} \sum_{j=1}^{N_{l_0}} \frac{\partial h_i^{l+1}}{\partial h_j^{l_0}} \frac{\partial h_i^{l+1}}{\partial h_j^{l_0}} \right] \\ &= \frac{1}{N_{l+1}} \mathbb{E}_\theta \left[ \sum_{i=1}^{N_{l+1}} \sum_{j=1}^{N_{l_0}} \left( \sum_{k=1}^{N_l} \frac{\partial h_i^{l+1}}{\partial \tilde{h}_k^l} \frac{\partial \tilde{h}_k^l}{\partial h_j^{l_0}} \frac{\partial h_k^l}{\partial h_j^{l_0}} \right) \left( \sum_{m=1}^{N_l} \frac{\partial h_i^{l+1}}{\partial \tilde{h}_m^l} \frac{\partial \tilde{h}_m^l}{\partial h_j^{l_0}} \frac{\partial h_m^l}{\partial h_j^{l_0}} \right) \right] \\ &= \frac{1}{N_{l+1}} \mathbb{E}_\theta \left[ \sum_{i=1}^{N_{l+1}} \sum_{j=1}^{N_{l_0}} \sum_{k,m=1}^{N_l} \left( w_{ik}^{l+1} \phi'(\tilde{h}_k^l) \frac{1}{\sqrt{\mathcal{K}^l}} \right) \left( w_{im}^{l+1} \phi'(\tilde{h}_m^l) \frac{1}{\sqrt{\mathcal{K}^l}} \right) \left( \frac{\partial h_k^l}{\partial h_j^{l_0}} \frac{\partial h_m^l}{\partial h_j^{l_0}} \right) \right] \\ &= \frac{\sigma_w^2}{N_l \mathcal{K}^l} \sum_{k=1}^{N_l} \mathbb{E}_\theta \left[ \phi'(\tilde{h}_k^l) \phi'(\tilde{h}_k^l) \left( \sum_{j=1}^{N_{l_0}} \frac{\partial h_k^l}{\partial h_j^{l_0}} \frac{\partial h_k^l}{\partial h_j^{l_0}} \right) \right] \\ &= \frac{\sigma_w^2}{N_l \mathcal{K}^l} \sum_{k=1}^{N_l} \mathbb{E}_\theta \left[ \phi'(\tilde{h}_k^l) \phi'(\tilde{h}_k^l) \right] \mathcal{J}^{l_0, l} \\ &= \chi_{\mathcal{J}}^l \mathcal{J}^{l_0, l}, \end{aligned} \quad (48)$$

571  $\square$

## 572 C.5 LayerNorm on activations

573 The general definition of LayerNorm on activations is given as follows.

**Definition C.12** (LayerNorm on Activations).

$$\widetilde{\phi(h_i^l)} = \frac{\phi(h_i^l) - \mathbb{E}[\phi(h^l)]}{\sqrt{\mathbb{E}[\phi(h^l)^2] - \mathbb{E}[\phi(h^l)]^2}} \gamma_i^l + \beta_i^l. \quad (49)$$

574 *Remark C.13.* The recurrence relation for preactivations (Eq.(1)) gets modified to

$$h_i^{l+1} = \sum_{j=1}^{N_l} w_{ij}^{l+1} \widetilde{\phi(h_j^l)} + b_i^{l+1}. \quad (50)$$

575 *Remark C.14.* At initialization, the parameters  $\gamma_i^l$  and  $\beta_i^l$  take the values 1 and 0, respectively. This  
576 leads to the form

$$\begin{aligned} \widetilde{\phi(h_i^l)} &= \frac{\phi(h_i^l) - \mathbb{E}[\phi(h^l)]}{\sqrt{\mathbb{E}[\phi(h^l)^2] - \mathbb{E}[\phi(h^l)]^2}} \\ &= \frac{\phi(h_i^l) - \mathbb{E}_\theta[\phi(h^l)]}{\sqrt{\mathbb{E}_\theta[\phi(h^l)^2] - \mathbb{E}_\theta[\phi(h^l)]^2}}, \end{aligned} \quad (51)$$

577 where the first line follows from the fact that at initialization, the parameters  $\gamma_i^l$  and  $\beta_i^l$  take the values  
578 1 and 0 respectively. In the second line, we have invoked the infinite width limit.

579 *Remark C.15.* Evaluating Gaussian average in this case is similar to cases in previous section. The  
580 only difference being that the averages are taking over the distribution  $h^{l-1} \sim \mathcal{N}(0, \mathcal{K}^{l-1} = \sigma_w^2 + \sigma_b^2)$ .  
581 Again this can be summarized as

$$\mathbb{E}_\theta[O(h_i^l)] = \frac{1}{\sqrt{2\pi(\sigma_w^2 + \sigma_b^2)}} \int dh_i^l O(h_i^l) e^{-\frac{(h_i^l)^2}{2(\sigma_w^2 + \sigma_b^2)}}. \quad (52)$$

582 Next, we calculate the modifications to the recurrence relations for the NNGP kernel and Jacobians.

583 **Theorem C.16.** *In the infinite width limit the recurrence relation for the NNGP kernel with Layer-*  
584 *Norm on activations is*

$$\mathcal{K}^{l+1} = \sigma_w^2 + \sigma_b^2. \quad (53)$$

*Proof.*

$$\begin{aligned} \mathcal{K}^{l+1} &= \frac{1}{N_{l+1}} \sum_{i=1}^{N_{l+1}} \mathbb{E}_\theta[h_i^{l+1} h_i^{l+1}] \\ &= \frac{1}{N_{l+1}} \sum_{i=1}^{N_{l+1}} \mathbb{E}_\theta \left[ \left( \sum_{j=1}^{N_l} w_{ij}^{l+1} \widetilde{\phi(h_j^l)} + b_i^{l+1} \right) \left( \sum_{k=1}^{N_l} w_{ik}^{l+1} \widetilde{\phi(h_k^l)} + b_i^{l+1} \right) \right] \\ &= \frac{\sigma_w^2}{N_l} \sum_{j=1}^{N_l} \mathbb{E}_\theta \left[ \widetilde{\phi(h_j^l)}^2 \right] + \sigma_b^2 \\ &= \frac{\sigma_w^2}{N_l} \sum_{j=1}^{N_l} \mathbb{E}_\theta \left[ \left( \frac{\phi(h_j^l) - \mathbb{E}_\theta[\phi(h^l)]}{\sqrt{\mathbb{E}_\theta[\phi(h^l)^2] - \mathbb{E}_\theta[\phi(h^l)]^2}} \right)^2 \right] + \sigma_b^2 \\ &= \frac{\sigma_w^2}{N_l} \sum_{j=1}^{N_l} \frac{\mathbb{E}_\theta[(\phi(h_j^l) - \mathbb{E}_\theta[\phi(h^l)])^2]}{\mathbb{E}_\theta[\phi(h^l)^2] - \mathbb{E}_\theta[\phi(h^l)]^2} + \sigma_b^2 \\ &= \sigma_w^2 + \sigma_b^2. \end{aligned} \quad (54)$$

585 □

586 **Theorem C.17.** *In the infinite width limit the recurrence relation for partial Jacobian with LayerNorm*  
587 *on activations is*

$$\mathcal{J}^{l_0, l+1} = \chi_J^l \mathcal{J}^{l_0, l}, \quad (55)$$

588 where  $\chi_J^l \equiv \sigma_w^2 \frac{\mathbb{E}_\theta[\phi'(h^l)^2]}{\mathbb{E}_\theta[\phi(h^l)^2] - \mathbb{E}_\theta[\phi(h^l)]^2}$ .



*Proof.*

$$\begin{aligned}
\mathcal{J}^{l_0, l+1} &= \frac{1}{N_{l+1}} \mathbb{E}_\theta \left[ \sum_{i=1}^{N_{l+1}} \sum_{j=1}^{N_{l_0}} \frac{\partial h_i^{l+1}}{\partial h_j^{l_0}} \frac{\partial h_i^{l+1}}{\partial h_j^{l_0}} \right] \\
&= \frac{1}{N_{l+1}} \mathbb{E}_\theta \left[ \sum_{i=1}^{N_{l+1}} \sum_{j=1}^{N_{l_0}} \left( \sum_{k=1}^{N_l} \frac{\partial h_i^{l+1}}{\partial h_k^l} \frac{\partial h_k^l}{\partial h_j^{l_0}} \right) \left( \sum_{m=1}^{N_l} \frac{\partial h_i^{l+1}}{\partial h_m^l} \frac{\partial h_m^l}{\partial h_j^{l_0}} \right) \right] \\
&= \frac{1}{N_{l+1}} \mathbb{E}_\theta \left[ \sum_{i=1}^{N_{l+1}} \sum_{j=1}^{N_{l_0}} \sum_{k,m=1}^{N_l} \left( w_{ik}^{l+1} \widetilde{\phi'(h_k^l)} \right) \left( w_{im}^{l+1} \widetilde{\phi'(h_m^l)} \right) \left( \frac{\partial h_k^l}{\partial h_j^{l_0}} \frac{\partial h_m^l}{\partial h_j^{l_0}} \right) \right] \\
&= \frac{\sigma_w^2}{N_l} \sum_{k=1}^{N_l} \sum_{j=1}^{N_{l_0}} \mathbb{E}_\theta \left[ \widetilde{\phi'(h_k^l)} \widetilde{\phi'(h_k^l)} \left( \sum_{j=1}^{N_{l_0}} \frac{\partial h_k^l}{\partial h_j^{l_0}} \frac{\partial h_k^l}{\partial h_j^{l_0}} \right) \right] \\
&= \frac{\sigma_w^2}{N_l} \sum_{k=1}^{N_l} \mathbb{E}_\theta \left[ \widetilde{\phi'(h_k^l)}^2 \right] \mathcal{J}^{l_0, l} \\
&= \sigma_w^2 \frac{\mathbb{E}_\theta [\phi'(h^l)^2]}{\mathbb{E}_\theta [\phi(h^l)^2] - \mathbb{E}_\theta [\phi(h^l)]^2} \mathcal{J}^{l_0, l} \\
&= \chi_J^l \mathcal{J}^{l_0, l}, \tag{56}
\end{aligned}$$

589

□

## D Critical Exponents

590

591 To prove theorem 2.7, we first need to find the critical exponent of the NNGP kernel [40].

592 **Lemma D.1.** *In the infinite width limit, consider a critically initialized network with a activation*  
593 *function  $\phi$ . The scaling behavior of the fluctuation  $\delta \mathcal{K}^l \equiv \mathcal{K}^l - \mathcal{K}^*$  is non-exponential. If the*  
594 *recurrence relation can be expand to leading order  $\delta \mathcal{K}^l$  as  $\delta \mathcal{K}^{l+1} \approx \delta \mathcal{K}^l - c_n (\delta \mathcal{K}^l)^n$  for  $n \geq 2$ . The*  
595 *solution of  $\delta \mathcal{K}^l$  is*

$$\delta \mathcal{K}^l = \frac{1}{c_n(n-1)} l^{-\zeta_K}, \tag{57}$$

596 where  $\zeta_K = \frac{1}{n-1}$ .

597 **Remark D.2.** The constant  $c_n$  and the order of first non-zero term  $n$  is determined by the choice of  
598 activation function.

599 *Proof.* We can expand the recurrence relation for the NNGP kernel (10) to second order of  $\delta \mathcal{K}^l =$   
600  $\mathcal{K}^l - \mathcal{K}^*$  on both side.

$$\delta \mathcal{K}^{l+1} \approx \delta \mathcal{K}^l - c_n (\delta \mathcal{K}^l)^n. \tag{58}$$

601 Use power law ansatz  $\delta \mathcal{K}^l = A l^{-\zeta_K}$  then

$$(l+1)^{-\zeta_K} = l^{-\zeta_K} - c_n A l^{-n\zeta_K}. \tag{59}$$

602 Multiply  $l^{\zeta_K}$  on both side then use Taylor expansion  $(\frac{l}{l+1})^{\zeta_K} \approx 1 - \frac{\zeta_K}{l}$

$$\frac{\zeta_K}{l} = c_n A l^{-(n-1)\zeta_K}. \tag{60}$$

603 For arbitrary  $l$ , the only non-trivial solution of the equation above is

$$A = \frac{1}{c_n(n-1)} \text{ and } \zeta_K = \frac{1}{n-1}. \tag{61}$$

604

□

605 *Proof of theorem 2.7.* We will assume  $c_2 \neq 0$ . Then use lemma D.1, we can expand  $\chi_{\mathcal{J}}^l$  in terms of  
 606  $\delta\mathcal{K}^l$ . To leading order  $l^{-1}$

$$\begin{aligned}\chi_{\mathcal{J}}^l &\approx 1 - d_1 \delta\mathcal{K}^l \\ &= 1 - \frac{d_1}{c_2} l^{-1}.\end{aligned}\tag{62}$$

607 Consider a sufficiently large  $l$ . In this case  $O(l^{-1})$  approximation is valid. We write recurrence  
 608 relations of Jacobians as

$$\begin{aligned}\mathcal{J}^{l_0, l} &= \prod_{l'=l_0}^{l-1} \left(1 - \frac{d_1}{c_2} l'^{-1}\right) \mathcal{J}^{l_0, l_0} \\ &\approx c_{l_0} \cdot l^{-\zeta}.\end{aligned}\tag{63}$$

609 When  $c_n = 0$  for all  $n \geq 2$ , from lemma D.1 we have  $\delta\mathcal{K}^l = 0$ . Thus the Jacobian saturates to some  
 610 constant.  $\square$

611 We checked the scaling empirically by plotting  $\mathcal{J}^{0, l}$  vs.  $l$  in a log-log plot and fitting the slope. These  
 612 results are presented in Fig.1.

## 613 E Residual Connections

614 **Definition E.1.** We define residual connections by the modified the recurrence relation for preactiva-  
 615 tions (Eq.(1))

$$h_i^{l+1} = \sum_{j=1}^{N_l} w_{ij}^{l+1} \phi(h_j^l) + b_i^{l+1} + \mu h_i^l,\tag{64}$$

616 where the parameter  $\mu$  controls the strength of the residual connection.

617 *Remark E.2.* Note that this definition requires  $N_{l+1} = N_l$ . We ensure this by only adding residual  
 618 connections to the hidden layers, which are of the same width. More generally, one can introduce a  
 619 tensor parameter  $\mu_{ij}$ .

620 *Remark E.3.* In general, the parameter  $\mu$  could be layer-dependent ( $\mu^l$ ). But we suppress this  
 621 dependence here since we are discussing self-similar networks.

622 **Theorem E.4.** In the infinite width limit, the recurrence relation for the NNGP kernel with residual  
 623 connections is changed by an additional term controlled by  $\mu$

$$\mathcal{K}^{l+1} = \frac{\sigma_w^2}{N_l} \sum_{j=1}^{N_l} \mathbb{E}_{\theta} [\phi(h_j^l) \phi(h_j^l)] + \sigma_b^2 + \mu^2 \mathcal{K}^l.\tag{65}$$

*Proof.*

$$\begin{aligned}\mathcal{K}^{l+1} &= \frac{1}{N_{l+1}} \sum_{i=1}^{N_{l+1}} \mathbb{E}_{\theta} [h_i^{l+1} h_i^{l+1}] \\ &= \frac{1}{N_{l+1}} \sum_{i=1}^{N_{l+1}} \mathbb{E}_{\theta} \left[ \left( \sum_{j=1}^{N_l} w_{ij}^{l+1} \phi(h_j^l) + b_i^{l+1} + \mu h_i^l \right) \left( \sum_{k=1}^{N_l} w_{ik}^{l+1} \phi(h_k^l) + b_i^{l+1} + \mu h_i^l \right) \right] \\ &= \frac{1}{N_{l+1}} \sum_{i=1}^{N_{l+1}} \mathbb{E}_{\theta} \left[ \sum_{j=1}^{N_l} \sum_{k=1}^{N_l} w_{ij}^{l+1} w_{ik}^{l+1} \phi(h_j^l) \phi(h_k^l) + b_i^{l+1} b_i^{l+1} + \mu^2 h_i^l h_i^l \right] \\ &= \frac{1}{N_{l+1}} \sum_{i=1}^{N_{l+1}} \mathbb{E}_{\theta} \left[ \frac{\sigma_w^2}{N_l} \sum_{j=1}^{N_l} \phi(h_j^l) \phi(h_j^l) + \sigma_b^2 \right] + \mu^2 \frac{1}{N_{l+1}} \sum_{i=1}^{N_{l+1}} \mathbb{E}_{\theta} [h_i^l h_i^l] \\ &= \frac{\sigma_w^2}{N_l} \sum_{j=1}^{N_l} \mathbb{E}_{\theta} [\phi(h_j^l) \phi(h_j^l)] + \sigma_b^2 + \mu^2 \mathcal{K}^l,\end{aligned}\tag{66}$$

624 where we used the fact  $N_{l+1} = N_l$  to get the last line.  $\square$

**Theorem E.5.** In the infinite width limit, the recurrence relation for partial Jacobians with residual connections has a simple multiplicative form

$$\mathcal{J}^{l_0, l+1} = \chi_{\mathcal{J}}^l \mathcal{J}^{l_0, l}, \quad (67)$$

where the recurrence coefficient is shifted to  $\chi_{\mathcal{J}}^l = \sigma_w^2 \mathbb{E}_{\theta} [\phi'(h_k^l) \phi'(h_k^l)] + \mu^2$ .

*Proof.*

$$\begin{aligned} \mathcal{J}^{l_0, l+1} &\equiv \frac{1}{N_{l+1}} \mathbb{E}_{\theta} \left[ \sum_{i=1}^{N_{l+1}} \sum_{j=1}^{N_{l_0}} \frac{\partial h_i^{l+1}}{\partial h_j^{l_0}} \frac{\partial h_i^{l+1}}{\partial h_j^{l_0}} \right] \\ &= \frac{1}{N_{l+1}} \mathbb{E}_{\theta} \left[ \sum_{i=1}^{N_{l+1}} \sum_{j=1}^{N_{l_0}} \left( \sum_{k=1}^{N_l} \frac{\partial h_i^{l+1}}{\partial h_k^l} \frac{\partial h_k^l}{\partial h_j^{l_0}} \right) \left( \sum_{m=1}^{N_l} \frac{\partial h_i^{l+1}}{\partial h_m^l} \frac{\partial h_m^l}{\partial h_j^{l_0}} \right) \right] \\ &= \frac{1}{N_{l+1}} \mathbb{E}_{\theta} \left[ \sum_{i=1}^{N_{l+1}} \sum_{j=1}^{N_{l_0}} \sum_{k,m=1}^{N_l} (w_{ik}^{l+1} \phi'(h_k^l) + \mu \delta_{ik}) (w_{im}^{l+1} \phi'(h_m^l) + \mu \delta_{im}) \left( \frac{\partial h_k^l}{\partial h_j^{l_0}} \frac{\partial h_m^l}{\partial h_j^{l_0}} \right) \right] \\ &= \frac{1}{N_{l+1}} \mathbb{E}_{\theta} \left[ \sum_{i=1}^{N_{l+1}} \sum_{j=1}^{N_{l_0}} \sum_{k,m=1}^{N_l} (w_{ik}^{l+1} w_{im}^{l+1} \phi'(h_k^l) \phi'(h_m^l) + \mu^2 \delta_{ik} \delta_{im}) \frac{\partial h_k^l}{\partial h_j^{l_0}} \frac{\partial h_m^l}{\partial h_j^{l_0}} \right] \\ &= \frac{\sigma_w^2}{N_l} \sum_{k=1}^{N_l} \mathbb{E}_{\theta} \left[ \phi'(h_k^l) \phi'(h_k^l) \left( \sum_{j=1}^{N_{l_0}} \frac{\partial h_k^l}{\partial h_j^{l_0}} \frac{\partial h_k^l}{\partial h_j^{l_0}} \right) \right] + \frac{1}{N_l} \sum_{k=1}^{N_l} \mathbb{E}_{\theta} \left[ \mu^2 \left( \sum_{j=1}^{N_{l_0}} \frac{\partial h_k^l}{\partial h_j^{l_0}} \frac{\partial h_k^l}{\partial h_j^{l_0}} \right) \right] \\ &= (\sigma_w^2 \mathbb{E}_{\theta} [\phi'(h_k^l) \phi'(h_k^l)] + \mu^2) \mathbb{E}_{\theta} \left[ \frac{1}{N_l} \sum_{k=1}^{N_l} \sum_{j=1}^{N_{l_0}} \frac{\partial h_k^l}{\partial h_j^{l_0}} \frac{\partial h_k^l}{\partial h_j^{l_0}} \right] \\ &= (\sigma_w^2 \mathbb{E}_{\theta} [\phi'(h_k^l) \phi'(h_k^l)] + \mu^2) \mathcal{J}^{l_0, l} \\ \mathcal{J}^{l_0, l+1} &= \chi_{\mathcal{J}}^l \mathcal{J}^{l_0, l}. \end{aligned} \quad (68)$$

□

## F Residual Connections with LayerNorm on Preactivations (Pre-LN)

We recall the recurrence relation (1):

$$h_i^{l+1} = \sum_{j=1}^{N_l} w_{ij}^{l+1} \phi(\tilde{h}_j^l) + b_i^{l+1} + \mu h_i^l. \quad (69)$$

**Theorem F.1.** In the infinite width limit, the recurrence relation for the NNGP kernel is then modified to

$$\mathcal{K}^{l+1} = \frac{\sigma_w^2}{N_l} \sum_{j=1}^{N_l} \mathbb{E}_{\theta} [\phi(\tilde{h}_j^l) \phi(\tilde{h}_j^l)] + \sigma_b^2 + \mu^2 \mathcal{K}^l. \quad (70)$$

*Proof.*

$$\begin{aligned} \mathcal{K}^{l+1} &= \frac{1}{N_{l+1}} \sum_{i=1}^{N_{l+1}} \mathbb{E}_{\theta} [h_i^{l+1} h_i^{l+1}] \\ &= \frac{1}{N_{l+1}} \sum_{i=1}^{N_{l+1}} \mathbb{E}_{\theta} \left[ \left( \sum_{j=1}^{N_l} w_{ij}^{l+1} \phi(\tilde{h}_j^l) + b_i^{l+1} + \mu h_i^l \right) \left( \sum_{k=1}^{N_l} w_{ik}^{l+1} \phi(\tilde{h}_k^l) + b_i^{l+1} + \mu h_i^l \right) \right] \\ &= \frac{\sigma_w^2}{N_l} \sum_{j=1}^{N_l} \mathbb{E}_{\theta} [\phi(\tilde{h}_j^l) \phi(\tilde{h}_j^l)] + \sigma_b^2 + \mu^2 \mathcal{K}^l. \end{aligned} \quad (71)$$

□

634 *Remark F.2.* For  $\mu < 1$ , the recursion relation has a fixed point

$$\mathcal{K}^* = \frac{\sigma_w^2}{N_{l^*}(1-\mu^2)} \sum_{j=1}^{N_{l^*}} \mathbb{E}_\theta \left[ \phi(\tilde{h}_j^{l^*}) \phi(\tilde{h}_j^{l^*}) \right] + \frac{\sigma_b^2}{1-\mu^2}. \quad (72)$$

635 where the average here is exactly the same as cases for LayerNorm applied to preactivations without  
636 residue connections.  $l^*$  labels some very large depth  $l$ .

637 *Remark F.3.* For  $\mu = 1$  case, the solution of (70) is

$$\mathcal{K}^l = \mathcal{K}^0 + \sum_{l'=1}^l \left( \frac{\sigma_w^2}{N_l} \sum_{j=1}^{N_l} \mathbb{E}_\theta \left[ \phi(\tilde{h}_j^{l'}) \phi(\tilde{h}_j^{l'}) \right] + \sigma_b^2 \right). \quad (73)$$

638 which is linearly growing since the expectation does not depend on depth.  $\mathcal{K}^0$  is the NNGP kernel  
639 after the input layer.

640 **Theorem F.4.** *In the infinite width limit, the recurrence relation for Jacobians changes by a constant*  
641 *shift in the recursion coefficient.*

$$\mathcal{J}^{l_0, l+1} = \chi_{\mathcal{J}}^l \mathcal{J}^{l_0, l}, \quad (74)$$

642 where for this case

$$\chi_{\mathcal{J}}^l = \frac{\sigma_w^2}{N_l \mathcal{K}^l} \sum_{k=1}^{N_l} \mathbb{E}_\theta \left[ \phi'(\tilde{h}_k^l) \phi'(\tilde{h}_k^l) \right] + \mu^2. \quad (75)$$

*Proof.*

$$\begin{aligned} \mathcal{J}^{l_0, l+1} &= \frac{1}{N_{l+1}} \mathbb{E}_\theta \left[ \sum_{i=1}^{N_{l+1}} \sum_{j=1}^{N_{l_0}} \frac{\partial h_i^{l+1}}{\partial h_j^{l_0}} \frac{\partial h_i^{l+1}}{\partial h_j^{l_0}} \right] \\ &= \frac{1}{N_{l+1}} \mathbb{E}_\theta \left[ \sum_{i=1}^{N_{l+1}} \sum_{j=1}^{N_{l_0}} \left( \sum_{k=1}^{N_l} \frac{\partial h_i^{l+1}}{\partial \tilde{h}_k^l} \frac{\partial \tilde{h}_k^l}{\partial h_j^{l_0}} \frac{\partial h_k^l}{\partial h_j^{l_0}} \right) \left( \sum_{m=1}^{N_l} \frac{\partial h_i^{l+1}}{\partial \tilde{h}_m^l} \frac{\partial \tilde{h}_m^l}{\partial h_j^{l_0}} \frac{\partial h_m^l}{\partial h_j^{l_0}} \right) \right] \\ &= \frac{1}{N_{l+1}} \mathbb{E}_\theta \left[ \sum_{i=1}^{N_{l+1}} \sum_{j=1}^{N_{l_0}} \sum_{k,m=1}^{N_l} \left( \frac{w_{ik}^{l+1} \phi'(\tilde{h}_k^l)}{\sqrt{\mathcal{K}^l}} + \mu \delta_{ik} \right) \left( \frac{w_{im}^{l+1} \phi'(\tilde{h}_m^l)}{\sqrt{\mathcal{K}^l}} + \mu \delta_{im} \right) \left( \frac{\partial h_k^l}{\partial h_j^{l_0}} \frac{\partial h_m^l}{\partial h_j^{l_0}} \right) \right] \\ &= \mathbb{E}_\theta \left[ \left( \frac{\sigma_w^2}{N_l \mathcal{K}^l} \sum_{k=1}^{N_l} \phi'(\tilde{h}_k^l) \phi'(\tilde{h}_k^l) + \mu^2 \right) \left( \sum_{j=1}^{N_{l_0}} \frac{\partial h_k^l}{\partial h_j^{l_0}} \frac{\partial h_k^l}{\partial h_j^{l_0}} \right) \right] \\ &= \left( \frac{\sigma_w^2}{N_l \mathcal{K}^l} \sum_{k=1}^{N_l} \mathbb{E}_\theta \left[ \phi'(\tilde{h}_k^l) \phi'(\tilde{h}_k^l) \right] + \mu^2 \right) \mathcal{J}^{l_0, l} \\ &= \chi_{\mathcal{J}}^l \mathcal{J}^{l_0, l}, \end{aligned} \quad (76)$$

643 □

644 *Remark F.5.* One can directly use results from cases without residue connections. We will momentarily  
645 see that the phase boundary does not change with residual connections when  $\mu < 1$ . However, the  
646 correlation length decays way slower when the network is initialized far from criticality.

647 *Remark F.6.* As we mentioned above  $\mu = 1$  needs extra care. Plug in the result (73) and  $\mu = 1$  we  
648 find out that

$$\begin{aligned} \chi_{\mathcal{J}}^l |_{\mu=1} &= \frac{\sigma_w^2 \sum_{k=1}^{N_l} \mathbb{E}_\theta \left[ \phi'(\tilde{h}_k^l) \phi'(\tilde{h}_k^l) \right]}{N_l \mathcal{K}^0 + \sum_{l'=1}^l \left( \sigma_w^2 \sum_{j=1}^{N_l} \mathbb{E}_\theta \left[ \phi(\tilde{h}_j^{l'}) \phi(\tilde{h}_j^{l'}) \right] + N_l \sigma_b^2 \right)} + 1 \\ &\sim 1 + O\left(\frac{1}{l}\right), \end{aligned} \quad (77)$$

649 which leads to power law behaved Jacobians at large depth. Where the exponent  $\zeta$  is not universal.

650 Recall that  $\xi = |\log \chi_{\mathcal{J}}^*|^{-1}$ , then Theorem 1.3 is a summary of (72) and (75) for  $\mu < 1$ ; and (77) for  
651  $\mu = 1$  in  $l \rightarrow \infty$  limit.

## G MLP-Mixer

In this section we would like to analyze an architecture called MLP-Mixer [43], which is based on multi-layer perceptrons (MLPs). A MLP-Mixer (i) chops images into patches, then applies affine transformations per patch, (ii) applies several Mixer Layers, (iii) applies pre-head LayerNorm, Global Average Pooling, an output affine transformation. We will explain the architecture by showing forward pass equations.

Suppose one has a single input with dimension  $(C_{in}, H_{in}, W_{in})$ . We label it as  $x_{\mu i}$ , where the Greek letter labels channels and the Latin letter labels flattened pixels.

First of all the (i) is realized by a special convolutional layer, where kernel size  $f$  is equal to the stride  $s$ . Then first convolution layer can be written as

$$h_{\mu i}^0 = \sum_{j=1}^{f^2} \sum_{\nu=1}^{C_{in}} W_{\mu\nu;j}^0 x_{\nu,j+(i-1)s^2} + b_{\mu i}^0, \quad (78)$$

where  $f$  is the size of filter and  $s$  is the stride. In our example  $f = s$ . Notice in PyTorch both bias and weights are sampled from a uniform distribution  $\mathcal{U}(-\sqrt{k}, \sqrt{k})$ , where  $k = (C_{in}f^2)^{-1}$ .

$$\mathbb{E}_{\theta}[W_{\mu\nu;i}^0 W_{\rho\sigma;j}^0] = \frac{1}{3C_{in}f^2} \delta_{\mu\rho} \delta_{\nu\sigma} \delta_{ij}, \quad (79)$$

$$\mathbb{E}_{\theta}[b_{\mu i}^0 b_{\nu j}^0] = \frac{1}{3C_{in}f^2} \delta_{\mu\nu} \delta_{ij}. \quad (80)$$

Notice that the output of Conv2d:  $h_{\mu i}^0 \in \mathbb{R}^{C \times N_p}$ , where  $C$  stands for channels and  $N_p = H_{in}W_{in}/f^2$  stands for patches, both of them will be mixed later by Mixer layers.

Next we stack  $l$  Mixer Layers. A Mixer Layer contains LayerNorms and two MLPs, where the first one mixed patches  $i, j$  (token mixing) with a hidden dimension  $N_{tm}$ , the second one mixed channels  $\mu, \nu$  (channel-mixing) with a hidden dimension  $N_{cm}$ . Notice that for Mixer Layers we use the standard parameterization.

- First LayerNorm. It acts on channels  $\mu$ .

$$\tilde{h}_{\mu i}^{6l} = \frac{h_{\mu i}^{6l} - \mathbb{E}_C[h_{\rho i}^{6l}]}{\sqrt{\text{Var}_C[h_{\rho i}^{6l}]}} \quad (81)$$

where we defined a channel mean  $\mathbb{E}_C[h_{\rho i}^{6l}] \equiv \frac{1}{C} \sum_{\rho=1}^C h_{\rho i}^{6l}$  and channel variance  $\text{Var}_C \equiv \mathbb{E}_C[(h_{\rho i}^{6l})^2] - (\mathbb{E}_C[h_{\rho i}^{6l}])^2$ .

- First MlpBlock. It mixes patches  $i, j$ , preactivations from different channels share the same weight and bias.
  - $6l + 1$ : Linear Affine Layer.

$$h_{\mu j}^{6l+1} = \sum_{k=1}^{N_p} w_{jk}^{6l+1} \tilde{h}_{\mu k}^{6l} + b_j^{6l+1}. \quad (82)$$

- $6l + 2$ : Affine Layer.

$$h_{\mu i}^{6l+2} = \sum_{j=1}^{N_{tm}} w_{ij}^{6l+2} \phi(h_{\mu j}^{6l+1}) + b_i^{6l+2}, \quad (83)$$

where  $N_{tm}$  stands for hidden dimension of "token mixing".

- $6l + 3$ : Residual Connections.

$$h_{\mu i}^{6l+3} = h_{\mu i}^{6l+2} + \mu h_{\mu i}^{6l}. \quad (84)$$

- Second LayerNorm. It again acts on channels  $\mu$ .

$$\tilde{h}_{\mu i}^{6l+3} = \frac{h_{\mu i}^{6l+3} - \mathbb{E}_C[h_{\rho i}^{6l+3}]}{\sqrt{\text{Var}_C[h_{\rho i}^{6l+3}]}}. \quad (85)$$

- Second MlpBlock. It mixes channels  $\mu, \nu$ , preactivations from different patches share the same weight and bias.

- $6l + 4$ : Linear Affine Layer.

$$h_{\nu i}^{6l+4} = \sum_{\rho=1}^C w_{\nu\rho}^{6l+4} \tilde{h}_{\rho i}^{6l+3} + b_{\nu}^{6l+4}. \quad (86)$$

- $6l + 5$ . Affine Layer.

$$h_{\mu i}^{6l+5} = \sum_{\nu=1}^{N_{cm}} w_{\mu\nu}^{6l+5} \phi(h_{\nu i}^{6l+4}) + b_{\mu}^{6l+5}. \quad (87)$$

- $6l + 6$ . Residual Connections.

$$h_{\mu i}^{6l+6} = h_{\mu i}^{6l+5} + \mu h_{\mu i}^{6l+3}. \quad (88)$$

Suppose the network has  $L$  Mixer layers. After those layers the network has a pre-head LayerNorm layer, a global average pooling layer and a output layer. The pre-head LayerNorm normalizes over channels  $\mu$  can be described as the following

$$\tilde{h}_{\mu i}^{6L} = \frac{h_{\mu i}^{6L} - \mathbb{E}_C[h_{\rho i}^{6L}]}{\sqrt{\text{Var}_C[h_{\rho i}^{6L}]}}. \quad (89)$$

Global Average Pool over patches  $i$ .

$$h_{\mu}^p = \frac{1}{N_p} \sum_{i=1}^{N_p} \tilde{h}_{\mu i}^{6L}. \quad (90)$$

Output Layer

$$f_{\mu} = \sum_{\nu=1}^C w_{\mu\nu} h_{\nu}^p + b_{\mu}. \quad (91)$$

We plotted phase diagram using the following quantity from repeating Mixer Layers:

$$\chi_{\mathcal{J}}^* = \lim_{L \rightarrow \infty} \left( \frac{1}{N_p C} \sum_{i=1}^{N_p} \sum_{\mu=1}^C \mathbb{E}_{\theta} \left[ \sum_{\rho=1}^C \sum_{k=1}^{N_p} \frac{\partial h_{\mu i}^{6L}}{\partial h_{\rho k}^{6L-6}} \frac{\partial h_{\mu i}^{6L}}{\partial h_{\rho k}^{6L-6}} \right] \right). \quad (92)$$

## H Results for Scale Invariant Activation Functions

**Definition H.1** (Scale invariant activation functions).

$$\phi(x) = a_+ x \Theta(x) + a_- x \Theta(-x), \quad (93)$$

where  $\Theta(x)$  is the Heaviside step function. ReLU is the special case with  $a_+ = 1$  and  $a_- = 0$ .

## 693 H.1 NNGP Kernel

694 First evaluate the average using lemma 2.2

$$\begin{aligned}\mathbb{E}_\theta [\phi(h_i^l)\phi(h_i^l)] &= \frac{1}{\sqrt{2\pi\mathcal{K}^l}} \int dh_i^l (a_+^2 + a_-^2) (h_i^l)^2 e^{-\frac{(h_i^l)^2}{2\mathcal{K}^l}} \\ &= \frac{a_+^2 + a_-^2}{2} \mathcal{K}^l.\end{aligned}\quad (94)$$

695 Thus we obtain the recurrence relation for the NNGP kernel with scale invariant activation function.

$$\mathcal{K}^{l+1} = \frac{\sigma_w^2(a_+^2 + a_-^2)}{2} \mathcal{K}^l + \sigma_b^2. \quad (95)$$

696 Finite fixed point of the recurrence relation above exists only if

$$\chi_{\mathcal{K}}^* = \frac{\sigma_w^2(a_+^2 + a_-^2)}{2} \leq 1. \quad (96)$$

697 As a result

$$\sigma_w^2 \leq \frac{2}{a_+^2 + a_-^2}. \quad (97)$$

698 For  $\sigma_w^2 = \frac{2}{a_+^2 + a_-^2}$  case, finite fixed point exists only if  $\sigma_b^2 = 0$ .

## 699 H.2 Jacobian(s)

700 The calculation is quite straight forward, by definition

$$\begin{aligned}\chi_{\mathcal{J}}^l &= \sigma_w^2 \mathbb{E}_\theta [\phi'(h_i^l)\phi'(h_i^l)] \\ &= \frac{\sigma_w^2}{\sqrt{2\pi\mathcal{K}^l}} \int dh_i^l [a_+\Theta(h_i^l) - a_-\Theta(h_i^l)]^2 e^{-\frac{(h_i^l)^2}{2\mathcal{K}^l}} \\ &= \frac{\sigma_w^2(a_+^2 + a_-^2)}{2},\end{aligned}\quad (98)$$

701 where we used the property  $x\delta(x) = 0$  for Dirac's delta function to get the first line.

702 Thus the critical line is defined by

$$\sigma_w = \sqrt{\frac{2}{a_+^2 + a_-^2}}. \quad (99)$$

703 For ReLU with  $a_+ = 1$  and  $a_- = 0$ , the network is at critical line when

$$\sigma_w = \sqrt{2}, \quad (100)$$

704 where the critical point is located at

$$(\sigma_w, \sigma_b) = (\sqrt{2}, 0). \quad (101)$$

## 705 H.3 Critical Exponents

706 Since the recurrence relations for the NNGP kernel and Jacobians are linear. Then from lemma D.1  
707 and theorem 2.7

$$\zeta_{\mathcal{K}} = 0 \text{ and } \zeta = 0. \quad (102)$$

#### 708 H.4 LayerNorm on Pre-activations

709 Use lemma C.9 and combine all known results for scale invariant functions

$$\begin{aligned}\chi_{\mathcal{J}}^l &= \frac{\sigma_w^2}{N_l \mathcal{K}^l} \sum_{k=1}^{N_l} \mathbb{E}_{\theta} \left[ \phi'(\tilde{h}_k^l) \phi'(\tilde{h}_k^l) \right] \Big|_{\tilde{\mathcal{K}}^{l-1}=1} \\ &= \frac{\sigma_w^2 (a_+^2 + a_-^2)}{\sigma_w^2 (a_+^2 + a_-^2) + 2\sigma_b^2}.\end{aligned}\quad (103)$$

710 For this case,

$$\chi_{\mathcal{J}}^l \leq 1 \quad (104)$$

711 is always true. The equality only holds at  $\sigma_b = 0$  line.

#### 712 H.5 LayerNorm on Activations

713 First we substitute  $\mathcal{K}^{l-1} = \sigma_w^2 + \sigma_b^2$  into known results

$$\mathbb{E}_{\theta} [\phi'(h_i^l) \phi'(h_i^l)] = \frac{a_+^2 + a_-^2}{2}, \quad (105)$$

$$\mathbb{E}_{\theta} [\phi(h_i^l) \phi(h_i^l)] = \frac{a_+^2 + a_-^2}{2} (\sigma_w^2 + \sigma_b^2). \quad (106)$$

714 There is a new expectation value we need to show explicitly

$$\begin{aligned}\mathbb{E}_{\theta} [\phi(h_i^l)] &= \frac{1}{\sqrt{2\pi(\sigma_w^2 + \sigma_b^2)}} \int_{-\infty}^{\infty} dh_i^l \phi(h_i^l) e^{-\frac{1}{2} h_i^l (\sigma_w^2 + \sigma_b^2)^{-1} h_i^l} \\ &= \frac{1}{\sqrt{2\pi(\sigma_w^2 + \sigma_b^2)}} \int_0^{\infty} dh_i^l (a_+ - a_-) h_i^l e^{-\frac{(h_i^l)^2}{2(\sigma_w^2 + \sigma_b^2)}} \\ &= (a_+ - a_-) \sqrt{\frac{\sigma_w^2 + \sigma_b^2}{2\pi}}.\end{aligned}\quad (107)$$

715 Thus

$$\chi_{\mathcal{J}}^l = \frac{\sigma_w^2}{\sigma_w^2 + \sigma_b^2} \cdot \frac{\pi(a_+^2 + a_-^2)}{\pi(a_+^2 + a_-^2) - (a_+ - a_-)^2}. \quad (108)$$

716 The critical line is defined by  $\chi_{\mathcal{J}}^* = 1$ , which can be solved as

$$\sigma_b = \sqrt{\frac{(a_+ - a_-)^2}{\pi(a_+^2 + a_-^2) - (a_+ - a_-)^2}} \sigma_w. \quad (109)$$

717 For ReLU with  $a_+ = 1$  and  $a_- = 0$

$$\begin{aligned}\sigma_b &= \sqrt{\frac{1}{\pi - 1}} \sigma_w \\ &\approx 0.683 \sigma_w.\end{aligned}\quad (110)$$

#### 718 H.6 Residual Connections

719 The recurrence relation for the NNGP kernel can be evaluated to be

$$\mathcal{K}^{l+1} = \frac{\sigma_w^2 (a_+^2 + a_-^2)}{2} \mathcal{K}^l + \sigma_b^2 + \mu^2 \mathcal{K}^l. \quad (111)$$

720 The condition for the existence of fixed point

$$\chi_{\mathcal{K}}^* = \frac{\sigma_w^2 (a_+^2 + a_-^2)}{2} + \mu^2 \leq 1 \quad (112)$$



721 leads us to

$$\sigma_w^2 \leq \frac{2(1-\mu^2)}{a_+^2 + a_-^2}. \quad (113)$$

722 For  $\sigma_w^2 = \frac{2(1-\mu^2)}{a_+^2 + a_-^2}$ , finite fixed point exists only if  $\sigma_b^2 = 0$ . (Diverges linearly otherwise)

723 The recurrence coefficient for Jacobian is evaluated to be

$$\chi_{\mathcal{J}}^* = \frac{\sigma_w^2(a_+^2 + a_-^2)}{2} + \mu^2. \quad (114)$$

724 The critical line is defined as

$$\sigma_w = \sqrt{\frac{2(1-\mu^2)}{a_+^2 + a_-^2}}. \quad (115)$$

725 The critical point is located at  $\left(\sqrt{\frac{2(1-\mu^2)}{a_+^2 + a_-^2}}, 0\right)$ .

726 For ReLU, the critical point is at  $\left(\sqrt{2(1-\mu^2)}, 0\right)$ .

## 727 H.7 Residual Connections with LayerNorm on Preactivations (Pre-LN)

728 Again use lemma C.9 and combine all known results for scale invariant functions

$$\begin{aligned} \chi_{\mathcal{J}}^* &= \lim_{l \rightarrow \infty} \left( \frac{\sigma_w^2}{N_l \mathcal{K}^l} \sum_{k=1}^{N_l} \mathbb{E}_{\theta} \left[ \phi'(\tilde{h}_k^l) \phi'(\tilde{h}_k^l) \right] \right) \Big|_{\tilde{\mathcal{K}}^{l-1}=1} + \mu^2 \\ &= \frac{\sigma_w^2(a_+^2 + a_-^2)(1-\mu^2)}{\sigma_w^2(a_+^2 + a_-^2) + 2\sigma_b^2} + \mu^2 \\ &= 1 - \frac{2\sigma_b^2(1-\mu^2)}{\sigma_w^2(a_+^2 + a_-^2) + 2\sigma_b^2} \end{aligned} \quad (116)$$

729 Similar to the case without residue connections

$$\chi_{\mathcal{J}}^l \leq 1 \quad (117)$$

730 is always true. The equality only holds at  $\sigma_b = 0$  line for  $\mu < 1$ .

731 Notice there is a very special case  $\mu = 1$ , where the whole  $\sigma_b - \sigma_w$  plane is critical.

## 732 I Results for erf Activation Function

**Definition I.1** (erf activation function).

$$\phi(x) = \frac{2}{\sqrt{\pi}} \int_0^x e^{-t^2} dt. \quad (118)$$

### 733 I.1 NNGP Kernel

734 To evaluate lemma 2.2 exactly, we introduce two dummy variables  $\lambda_1$  and  $\lambda_2$ [45].

$$\begin{aligned} \mathbb{E}_{\theta} [\phi(\lambda_1 h_i^l) \phi(\lambda_2 h_i^l)] &= \int d\lambda_1 \int d\lambda_2 \frac{d^2}{d\lambda_1 d\lambda_2} \mathbb{E}_{\theta} [\phi(\lambda_1 h_i^l) \phi(\lambda_2 h_i^l)] \\ &= \int d\lambda_1 \int d\lambda_2 \int dh_i^l \frac{4}{\sqrt{2\pi^3 \mathcal{K}^l}} (h_i^l)^2 e^{-(\lambda_1^2 + \lambda_2^2 + \frac{1}{2\mathcal{K}^l})(h_i^l)^2} \\ &= \int d\lambda_1 \int d\lambda_2 \frac{4\mathcal{K}^l}{\pi(1 + 2\mathcal{K}^l(\lambda_1^2 + \lambda_2^2))} \\ &= \frac{2}{\pi} \arcsin \left( \frac{2\mathcal{K}^l \lambda_1 \lambda_2}{1 + 2\mathcal{K}^l(\lambda_1^2 + \lambda_2^2)} \right). \end{aligned} \quad (119)$$

735 We use the special case where  $\lambda_1 = \lambda_2 = 1$ .

736 Thus the recurrence relation for the NNGP kernel with erf activation function is

$$\mathcal{K}^{l+1} = \frac{2\sigma_w^2}{\pi} \arcsin\left(\frac{2\mathcal{K}^l}{1+2\mathcal{K}^l}\right) + \sigma_b^2. \quad (120)$$

737 As in scale invariant case, finite fixed point only exists when

$$\chi_{\mathcal{K}}^* = \frac{4\sigma_w^2}{\pi} \frac{1}{(1+2\mathcal{K}^*)\sqrt{1+4\mathcal{K}^*}} \leq 1. \quad (121)$$

738 Numerical results show the condition is satisfied everywhere in  $\sigma_b - \sigma_w$  plane, where  $\chi_{\mathcal{K}}^* = 1$  is only  
739 possible when  $\mathcal{K}^* = 0$ .

## 740 I.2 Jacobians

741 Follow the definition

$$\begin{aligned} \chi_{\mathcal{J}}^l &= \sigma_w^2 \mathbb{E}_{\theta} [\phi'(h_i^l) \phi'(h_i^l)] \\ &= \frac{4\sigma_w^2}{\sqrt{2\pi^3 \mathcal{K}^l}} \int dh_i^l e^{-2(h_i^l)^2} e^{-\frac{(h_i^l)^2}{2\mathcal{K}^l}} \\ &= \frac{4\sigma_w^2}{\pi} \frac{1}{\sqrt{1+4\mathcal{K}^l}}. \end{aligned} \quad (122)$$

742 To find phase boundary  $\chi_{\mathcal{J}}^* = 1$ , we need to combine Eq.(120) and Eq.(122) and evaluate them at  
743  $\mathcal{K}^*$ .

$$\mathcal{K}^* = \frac{2\sigma_w^2}{\pi} \arcsin\left(\frac{2\mathcal{K}^*}{1+2\mathcal{K}^*}\right) + \sigma_b^2, \quad (123)$$

$$\chi_{\mathcal{J}}^* = \frac{4\sigma_w^2}{\pi} \frac{1}{\sqrt{1+4\mathcal{K}^*}} = 1. \quad (124)$$

744 One can solve equations above and find the critical line

$$\sigma_b = \sqrt{\frac{16\sigma_w^4 - \pi^2}{4\pi^2} - \frac{2\sigma_w^2}{\pi} \arcsin\left(\frac{16\sigma_w^4 - \pi^2}{16\sigma_w^4 + \pi^2}\right)}. \quad (125)$$

745 Critical point is reached by further requiring  $\chi_{\mathcal{K}}^* = 1$ . Since  $\chi_{\mathcal{K}}^* \leq \chi_{\mathcal{J}}^*$ , the only possible case is  
746  $\mathcal{K}^* = 0$ , which is located at

$$(\sigma_w, \sigma_b) = \left(\sqrt{\frac{\pi}{4}}, 0\right). \quad (126)$$

## 747 I.3 Critical Exponents

748 We show how to extract critical exponents of the NNGP kernel and Jacobians of erf activation  
749 function.

750 Critical point for erf is at  $(\sigma_b, \sigma_w) = (0, \sqrt{\frac{\pi}{4}})$ , with  $\mathcal{K}^* = 0$ . Now suppose  $l$  is large enough such  
751 that the deviation of  $\mathcal{K}^l$  from fixed point value  $\mathcal{K}^*$  is small. Define  $\delta\mathcal{K}^l \equiv \mathcal{K}^l - \mathcal{K}^*$ . Eq.(120) can be  
752 rewritten as

$$\begin{aligned} \delta\mathcal{K}^{l+1} &= \frac{1}{2} \arcsin\left(\frac{2\delta\mathcal{K}^l}{1+2\delta\mathcal{K}^l}\right) \\ &\approx \delta\mathcal{K}^l - 2(\delta\mathcal{K}^l)^2. \end{aligned} \quad (127)$$

753 From lemma D.1

$$A = \frac{1}{2} \text{ and } \zeta_{\mathcal{K}} = 1. \quad (128)$$

754 Next we analyze critical exponent of Jacobians by expanding (122) around  $\mathcal{K}^* = 0$  critical point  
 755  $(\sigma_b, \sigma_w) = (0, \sqrt{\frac{\pi}{4}})$ .

756 To leading order  $l^{-1}$  we have

$$\begin{aligned}\chi_{\mathcal{J}}^l &\approx 1 - 2\delta K^l \\ &\approx 1 - \frac{1}{l}.\end{aligned}\tag{129}$$

757 Thus the recurrence relation for partial Jacobian, at large  $l$ , takes form

$$\mathcal{J}^{l_0, l+1} = \left(1 - \frac{1}{l}\right) \mathcal{J}^{l_0, l}.\tag{130}$$

758 At large  $l$

$$\mathcal{J}^{l_0, l} = c_{l_0} l^{-1},\tag{131}$$

759 with a non-universal constant  $c_{l_0}$ .

760 The critical exponent is

$$\zeta = 1,\tag{132}$$

761 which is the same as  $\zeta_{\mathcal{K}}$ .

#### 762 **I.4 LayerNorm on Pre-activations**

763 Use lemma C.9, we have

$$\begin{aligned}\chi_{\mathcal{J}}^l &= \frac{\sigma_w^2}{N_l \mathcal{K}^l} \sum_{k=1}^{N_l} \mathbb{E}_{\theta} \left[ \phi'(\tilde{h}_k^l) \phi'(\tilde{h}_k^l) \right] \Big|_{\tilde{\mathcal{K}}^{l-1}=1} \\ &= \frac{4\sigma_w^2}{\sqrt{5} \left[ 2\sigma_w^2 \arcsin\left(\frac{2}{3}\right) + \pi\sigma_b^2 \right]}.\end{aligned}\tag{133}$$

764 The critical line is then defined by

$$\begin{aligned}\sigma_b &= \sqrt{\frac{2}{\pi} \left[ \frac{2}{\sqrt{5}} - \arcsin\left(\frac{2}{3}\right) \right]} \sigma_w \\ &\approx 0.324 \sigma_w.\end{aligned}\tag{134}$$

#### 765 **I.5 LayerNorm on Activations**

766 Due to the symmetry of erf activation function  $\mathbb{E}_{\theta} [\phi(h_i^l)] = 0$ , we only need to modify our known  
 767 results.

$$\mathbb{E}_{\theta} [\phi'(h_i^l) \phi'(h_i^l)] = \frac{4}{\pi} \frac{1}{\sqrt{1 + 4(\sigma_w^2 + \sigma_b^2)}},\tag{135}$$

$$\mathbb{E}_{\theta} [\phi(h_i^l) \phi(h_i^l)] = \frac{2}{\pi} \arcsin\left(\frac{2(\sigma_w^2 + \sigma_b^2)}{1 + 2(\sigma_w^2 + \sigma_b^2)}\right).\tag{136}$$

768 Thus

$$\chi_{\mathcal{J}}^l = \frac{2\sigma_w^2}{\sqrt{1 + 4(\sigma_w^2 + \sigma_b^2)}} \cdot \frac{1}{\arcsin\left(\frac{2(\sigma_w^2 + \sigma_b^2)}{1 + 2(\sigma_w^2 + \sigma_b^2)}\right)},\tag{137}$$

769 where the phase boundary is defined by the transcendental equation  $\chi_{\mathcal{J}}^l = 1$ .

## 770 I.6 Residual Connections

771 The recurrence relation for the NNGP kernel can be evaluated to be

$$\mathcal{K}^{l+1} = \frac{2\sigma_w^2}{\pi} \arcsin\left(\frac{2\mathcal{K}^l}{1+2\mathcal{K}^l}\right) + \sigma_b^2 + \mu^2 \mathcal{K}^l. \quad (138)$$

772 Finite fixed point only exists when

$$\chi_{\mathcal{K}}^* = \frac{4\sigma_w^2}{\pi} \frac{1}{(1+2\mathcal{K}^*)\sqrt{1+4\mathcal{K}^*}} + \mu^2 \leq 1. \quad (139)$$

773 Notice that  $\chi_{\mathcal{K}}^* \leq \chi_{\mathcal{J}}^*$  still holds, where the equality holds only when  $\mathcal{K}^* = 0$ .

774 The recurrence coefficient for Jacobian is evaluated to be

$$\chi_{\mathcal{J}}^* = \frac{4\sigma_w^2}{\pi} \frac{1}{\sqrt{1+4\mathcal{K}^*}} + \mu^2. \quad (140)$$

775 The critical line is defined as

$$\sigma_b = \sqrt{\frac{16\sigma_w^4 - \pi^2(1-\mu^2)^2}{4\pi^2(1-\mu^2)}} - \frac{2\sigma_w^2}{\pi} \arcsin\left(\frac{16\sigma_w^4 - \pi^2(1-\mu^2)^2}{16\sigma_w^4 + \pi^2(1-\mu^2)^2}\right). \quad (141)$$

776 Critical point is reached by further requiring  $\chi_{\mathcal{K}}^* = 1$ . Since  $\chi_{\mathcal{K}}^* \leq \chi_{\mathcal{J}}^*$ , the only possible case is  
777  $\mathcal{K}^* = 0$ , which is located at

$$(\sigma_w, \sigma_b) = \left(\sqrt{\frac{\pi(1-\mu^2)}{4}}, 0\right). \quad (142)$$

778 Note that for  $\mu = 1$ , one needs to put extra efforts into analyzing the scaling behavior. First we notice  
779 that  $\mathcal{K}^l$  monotonically increases with depth  $l$  – the recurrence relation for the NNGP kernel at large  $l$   
780 (or large  $\mathcal{K}^l$ ) is

$$\mathcal{K}^{l+1} \approx \sigma_w^2 + \sigma_b^2 + \mathcal{K}^l, \quad (143)$$

781 which regulates the first term in (140).

782 For  $\mu = 1$  at large depth

$$\chi_{\mathcal{J}}^l \sim 1 + \frac{4\sigma_w^2}{\pi\sqrt{C_0 + 4(\sigma_w^2 + \sigma_b^2)l}}. \quad (144)$$

783 Here  $C_0$  is a constant that depends on the input.

784 We can approximate the asymptotic form of  $\log \mathcal{J}^{l_0, l}$  as follows

$$\begin{aligned} \log \mathcal{J}^{l_0, l} &= \log \left( \prod_{l'=l_0}^l \chi_{\mathcal{J}}^{l'} \right) \\ &= \sum_{l'=l_0}^l \log \left( 1 + \frac{4\sigma_w^2}{\pi\sqrt{C_0 + 4(\sigma_w^2 + \sigma_b^2)l'}} \right) \\ &\approx \int_{l_0}^l dl' \log \left( 1 + \frac{4\sigma_w^2}{\pi\sqrt{C_0 + 4(\sigma_w^2 + \sigma_b^2)l'}} \right) \\ &\sim 2\tilde{c}\sqrt{l} + O(\log l), \end{aligned} \quad (145)$$

785 where  $\tilde{c} = \frac{2\sigma_w^2}{\pi\sqrt{\sigma_w^2 + \sigma_b^2}}$ .

786 We conclude that at large depth, the APJN for  $\mu = 1$ , erf networks can be written as

$$\mathcal{J}^{l_0, l} \sim O\left(e^{2\tilde{c}\sqrt{l} + O(\log l)}\right). \quad (146)$$

787 This result checks out empirically, as shown in Figure 7.<sup>3</sup>

<sup>3</sup>We used NTK parameterization for this experiment. However, we emphasize that it does not affect the final result.

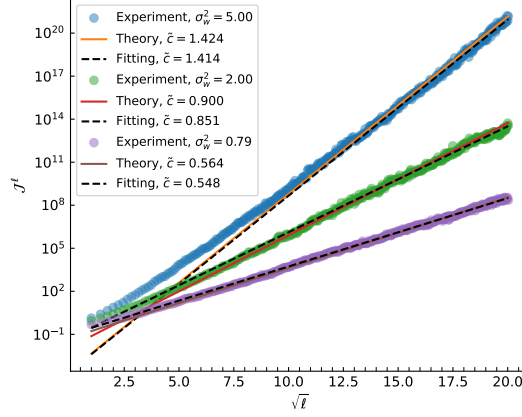

Figure 7:  $\log(\mathcal{J}^{l_0, l}) - \sqrt{l}$  for  $\mu = 1$ ,  $\sigma_b^2 = 0$ , erf.

## 788 I.7 Residual Connections with LayerNorm on Preactivations (Pre-LN)

789 Use lemma C.9 and results we had without residue connections for erf with LayerNorm on preactiva-  
790 tions.

$$\begin{aligned} \chi_{\mathcal{J}}^* &= \lim_{l \rightarrow \infty} \left( \frac{\sigma_w^2}{N_l \mathcal{K}^l} \sum_{k=1}^{N_l} \mathbb{E}_{\theta} \left[ \phi'(\tilde{h}_k^l) \phi'(\tilde{h}_k^l) \right] \right) \Big|_{\tilde{\mathcal{K}}^{l-1}=1} + \mu^2 \\ &= \frac{4\sigma_w^2(1 - \mu^2)}{\sqrt{5} [2\sigma_w^2 \arcsin(\frac{2}{3}) + \pi\sigma_b^2]} + \mu^2. \end{aligned} \quad (147)$$

791 The critical line is then defined by

$$\begin{aligned} \sigma_b &= \sqrt{\frac{2}{\pi} \left[ \frac{2}{\sqrt{5}} - \arcsin\left(\frac{2}{3}\right) \right]} \sigma_w \\ &\approx 0.324 \sigma_w. \end{aligned} \quad (148)$$

## 792 J Results for GELU Activation Function

**Definition J.1** (GELU activation function).

$$\begin{aligned} \phi(x) &= \frac{x}{2} \left[ 1 + \operatorname{erf}\left(\frac{x}{\sqrt{2}}\right) \right] \\ &= \frac{x}{2} \left[ 1 + \frac{2}{\sqrt{\pi}} \int_0^{\frac{x}{\sqrt{2}}} e^{-t^2} dt \right]. \end{aligned} \quad (149)$$

793 **J.1 NNGP Kernel**

794 Use lemma 2.2 for GELU

$$\begin{aligned}
\mathbb{E}_\theta [\phi(h_i^l)\phi(h_i^l)] &= \frac{1}{\sqrt{2\pi\mathcal{K}^l}} \int dh_i^l \frac{(h_i^l)^2}{4} \left[ 1 + \operatorname{erf}\left(\frac{h_i^l}{\sqrt{2}}\right) \right]^2 e^{-\frac{(h_i^l)^2}{2\mathcal{K}^l}} \\
&= \frac{1}{\sqrt{2\pi\mathcal{K}^l}} \int dh_i^l \frac{(h_i^l)^2}{4} \left[ 1 + \operatorname{erf}^2\left(\frac{h_i^l}{\sqrt{2}}\right) \right] e^{-\frac{(h_i^l)^2}{2\mathcal{K}^l}} \\
&= \frac{\mathcal{K}^l}{4} + \frac{1}{\sqrt{32\pi\mathcal{K}^l}} \int dh_i^l (h_i^l)^2 \operatorname{erf}^2\left(\frac{h_i^l}{\sqrt{2}}\right) e^{-\frac{(h_i^l)^2}{2\mathcal{K}^l}} \\
&= \frac{\mathcal{K}^l}{4} + \frac{\mathcal{K}^l}{\sqrt{32\pi\mathcal{K}^l}} \int dh_i^l \operatorname{erf}^2\left(\frac{h_i^l}{\sqrt{2}}\right) e^{-\frac{(h_i^l)^2}{2\mathcal{K}^l}} \\
&\quad + \frac{(\mathcal{K}^l)^2}{\sqrt{32\pi\mathcal{K}^l}} \int dh_i^l \left[ \operatorname{erf}'\left(\frac{h_i^l}{\sqrt{2}}\right) \operatorname{erf}'\left(\frac{h_i^l}{\sqrt{2}}\right) + \operatorname{erf}\left(\frac{h_i^l}{\sqrt{2}}\right) \operatorname{erf}''\left(\frac{h_i^l}{\sqrt{2}}\right) \right] e^{-\frac{(h_i^l)^2}{2\mathcal{K}^l}} \\
&= \frac{\mathcal{K}^l}{4} + \frac{\mathcal{K}^l}{2\pi} \left[ \arcsin\left(\frac{\mathcal{K}^l}{1+\mathcal{K}^l}\right) + \frac{2\mathcal{K}^l}{(1+\mathcal{K}^l)\sqrt{1+2\mathcal{K}^l}} \right], \tag{150}
\end{aligned}$$

795 where from the third line to the fourth line we used integrate by parts twice, and to get the last line  
796 we used results from erf activations.

797 Thus the recurrence relation for the NNGP kernel is

$$\mathcal{K}^{l+1} = \left[ \frac{\mathcal{K}^l}{4} + \frac{\mathcal{K}^l}{2\pi} \arcsin\left(\frac{\mathcal{K}^l}{1+\mathcal{K}^l}\right) + \frac{(\mathcal{K}^l)^2}{\pi(1+\mathcal{K}^l)\sqrt{1+2\mathcal{K}^l}} \right] \sigma_w^2 + \sigma_b^2. \tag{151}$$

798 As a result

$$\chi_{\mathcal{K}}^* = \frac{\sigma_w^2}{4} + \frac{\sigma_w^2}{2\pi} \left[ \arcsin\left(\frac{\mathcal{K}^*}{1+\mathcal{K}^*}\right) + \frac{4(\mathcal{K}^*)^3 + 11(\mathcal{K}^*)^2 + 5\mathcal{K}^*}{(1+\mathcal{K}^*)^2(1+2\mathcal{K}^*)^{\frac{3}{2}}} \right]. \tag{152}$$

799 **J.2 Jacobians**

800 Follow the definition

$$\begin{aligned}
\chi_{\mathcal{J}}^l &= \sigma_w^2 \mathbb{E}_\theta [\phi'(h_i^l)\phi'(h_i^l)] \\
&= \frac{\sigma_w^2}{\sqrt{2\pi\mathcal{K}^l}} \int dh_i^l \left[ \frac{1}{2} + \frac{1}{2} \operatorname{erf}\left(\frac{h_i^l}{\sqrt{2}}\right) + \frac{e^{-\frac{(h_i^l)^2}{2}} h_i^l}{\sqrt{2\pi}} \right]^2 e^{-\frac{(h_i^l)^2}{2\mathcal{K}^l}} \\
&= \frac{\sigma_w^2}{\sqrt{2\pi\mathcal{K}^l}} \int dh_i^l \left[ \frac{1}{4} + \frac{1}{4} \operatorname{erf}\left(\frac{h_i^l}{\sqrt{2}}\right)^2 + \frac{h_i^l \operatorname{erf}\left(\frac{h_i^l}{\sqrt{2}}\right) e^{-\frac{(h_i^l)^2}{2}}}{\sqrt{2\pi}} + \frac{e^{-(h_i^l)^2} (h_i^l)^2}{2\pi} \right] e^{-\frac{(h_i^l)^2}{2\mathcal{K}^l}} \\
&= \frac{\sigma_w^2}{4} + \frac{\sigma_w^2}{2\pi} \left[ \arcsin\left(\frac{\mathcal{K}^l}{1+\mathcal{K}^l}\right) + \frac{\mathcal{K}^l(3+5\mathcal{K}^l)}{(1+\mathcal{K}^l)(1+2\mathcal{K}^l)^{\frac{3}{2}}} \right], \tag{153}
\end{aligned}$$

801 where we dropped odd function terms to get the third line, and to get the last line we used known  
802 result for erf in the second term, integrate by parts in the third term.

803 Here to get the critical line is harder. One can use the recurrence relation for the NNGP kernel at  
804 fixed point  $\mathcal{K}^*$  and  $\chi_{\mathcal{J}}^* = 1$

$$\mathcal{K}^* = \frac{\sigma_w^2}{4} \mathcal{K}^* + \frac{\sigma_w^2}{2\pi} \left[ \arcsin\left(\frac{\mathcal{K}^*}{1+\mathcal{K}^*}\right) + \frac{\sigma_w^2 \mathcal{K}^*}{\pi(1+\mathcal{K}^*)\sqrt{1+2\mathcal{K}^*}} \right] \mathcal{K}^* + \sigma_b^2, \tag{154}$$

$$\chi_{\mathcal{J}}^* = \frac{\sigma_w^2}{4} + \frac{\sigma_w^2}{2\pi} \left[ \arcsin\left(\frac{\mathcal{K}^*}{1+\mathcal{K}^*}\right) + \frac{\mathcal{K}^*(3+5\mathcal{K}^*)}{(1+\mathcal{K}^*)(1+2\mathcal{K}^*)^{\frac{3}{2}}} \right] = 1. \tag{155}$$

805 Cancel the arcsin term,  $\sigma_w$  and  $\sigma_b$  then can be written as a function of  $\mathcal{K}^*$

$$\sigma_w = 2 \left[ 1 + \frac{2\mathcal{K}^*(3 + 5\mathcal{K}^*)}{\pi(1 + \mathcal{K}^*)(1 + 2\mathcal{K}^*)^{\frac{3}{2}}} + \frac{2}{\pi} \arcsin \left( \frac{\mathcal{K}^*}{1 + \mathcal{K}^*} \right) \right]^{-\frac{1}{2}}, \quad (156)$$

$$\sigma_b = \frac{\mathcal{K}^*}{\sqrt{2\pi}(1 + 2\mathcal{K}^*)^{\frac{3}{4}}} \sigma_w. \quad (157)$$

806 One can then scan  $\mathcal{K}^*$  to draw the critical line.

807 In order to locate critical point, we further require  $\chi_{\mathcal{K}}^* = 1$ . To locate the critical point, we solve  
808  $\chi_{\mathcal{J}}^* - \chi_{\mathcal{K}}^* = 0$  instead. We have

$$\frac{\sigma_w^2 [(\mathcal{K}^*)^3 - 3(\mathcal{K}^*)^2 - 2\mathcal{K}^*]}{2\pi(1 + \mathcal{K}^*)^2(1 + 2\mathcal{K}^*)^{\frac{3}{2}}} = 0, \quad (158)$$

809 which has two non-negative solutions out of three

$$\mathcal{K}^* = 0 \text{ and } \mathcal{K}^* = \frac{3 + \sqrt{17}}{2}. \quad (159)$$

810 One can then solve  $\sigma_b$  and  $\sigma_w$  by plugging corresponding  $\mathcal{K}^*$  values.

$$(\sigma_w, \sigma_b) = (2, 0), \text{ for } \mathcal{K}^* = 0, \quad (160)$$

$$(\sigma_w, \sigma_b) \approx (1.408, 0.416), \text{ for } \mathcal{K}^* = \frac{3 + \sqrt{17}}{2}. \quad (161)$$

### 811 J.3 Critical Exponents

812 GELU behaves in a different way compare to erf. First we discuss the  $\mathcal{K}^* = 0$  critical point, which is  
813 located at  $(\sigma_b, \sigma_w) = (0, 2)$ . We expand Eq.(151), and keep next to leading order  $\delta\mathcal{K}^l = \mathcal{K}^l - \mathcal{K}^*$

$$\delta\mathcal{K}^{l+1} \approx \delta\mathcal{K}^l + \frac{6}{\pi}(\delta\mathcal{K}^l)^2. \quad (162)$$

814 From lemma D.1

$$A = -\frac{\pi}{6} \text{ and } \zeta_{\mathcal{K}} = 1, \quad (163)$$

815 which is not possible since  $\delta\mathcal{K}^l \geq 0$  for this case. This result means scaling analysis is not working  
816 here.

817 Next, we consider the other fixed point with  $\mathcal{K}^* = \frac{3+\sqrt{17}}{2}$  at  $(\sigma_b, \sigma_w) = (0.416, 1.408)$ . Expand the  
818 NNGP kernel recurrence relation again.

$$\delta\mathcal{K}^{l+1} \approx \delta\mathcal{K}^l + 0.00014(\delta\mathcal{K}^l)^2. \quad (164)$$

819 Following the same analysis, we find

$$\delta\mathcal{K}^l \approx -7142.9 l^{-1}. \quad (165)$$

820 Looks like scaling analysis works for this case, since  $\mathcal{K}^* > 0$ . The solution shows that the critical  
821 point is half-stable[40]. If  $\mathcal{K}^l < \mathcal{K}^*$ , the fixed point is repealing, while when  $\mathcal{K}^l > \mathcal{K}^*$ , the fixed point  
822 is attractive. However, the extremely large coefficient in the scaling behavior of  $\delta\mathcal{K}^l$  embarrasses the  
823 analysis. Since for any network with a reasonable depth, the deviation  $\delta\mathcal{K}^l$  is not small.

824 Now we can expand  $\chi_{\mathcal{J}}^l$  at some large depth, up to leading order  $l^{-1}$ .

$$\chi_{\mathcal{J}}^l \approx 1 - \frac{66.668}{l}. \quad (166)$$

825 Then

$$\delta\mathcal{J}^{l_0, l} \approx c_{l_0} l^{-66.668}, \quad (167)$$

826 where  $c_{l_0}$  is a positive non-universal constant.

827 Critical exponent

$$\zeta = 66.668. \quad (168)$$

828 Which in practice is not traceable.

#### 829 J.4 LayerNorm on Pre-activations

830 Use lemma C.9, we have

$$\begin{aligned}\chi_{\mathcal{J}}^l &= \frac{\sigma_w^2}{N_l \mathcal{K}^l} \sum_{k=1}^{N_l} \mathbb{E}_{\theta} \left[ \phi'(\tilde{h}_k^l) \phi'(\tilde{h}_k^l) \right] \Big|_{\tilde{\mathcal{K}}^{l-1}=1} \\ &= \frac{\sigma_w^2 (6\pi + 4\sqrt{3})}{\sigma_w^2 (6\pi + 3\sqrt{3}) + 18\pi\sigma_b^2}.\end{aligned}\quad (169)$$

831 The critical line is then at

$$\begin{aligned}\sigma_b &= \left(6\sqrt{3}\pi\right)^{-\frac{1}{2}} \sigma_w \\ &\approx 0.175\sigma_w.\end{aligned}\quad (170)$$

#### 832 J.5 LayerNorm on Activations

833 First we need to evaluate a new expectation value

$$\begin{aligned}\mathbb{E}_{\theta} [\phi(h_i^l)] &= \frac{1}{\sqrt{2\pi(\sigma_w^2 + \sigma_b^2)}} \int dh_i^l \frac{h_i^l}{2} \left[ 1 + \operatorname{erf}\left(\frac{x}{\sqrt{2}}\right) \right] e^{-\frac{(h_i^l)^2}{2(\sigma_w^2 + \sigma_b^2)}} \\ &= \frac{\sigma_w^2 + \sigma_b^2}{\sqrt{2\pi(1 + \sigma_w^2 + \sigma_b^2)}},\end{aligned}\quad (171)$$

834 where we used integrate by parts to get the result.

835 The other integrals are modified to

$$\mathbb{E}_{\theta} [\phi'(h_i^l) \phi'(h_i^l)] = \frac{1}{4} + \frac{1}{2\pi} \left[ \arcsin\left(\frac{\sigma_w^2 + \sigma_b^2}{1 + \sigma_w^2 + \sigma_b^2}\right) + \frac{(\sigma_w^2 + \sigma_b^2)[3 + 5(\sigma_w^2 + \sigma_b^2)]}{(1 + \sigma_w^2 + \sigma_b^2)[1 + 2(\sigma_w^2 + \sigma_b^2)]^{\frac{3}{2}}} \right], \quad (172)$$

$$\mathbb{E}_{\theta} [\phi(h_i^l) \phi(h_i^l)] = \frac{\sigma_w^2 + \sigma_b^2}{4} + \frac{\sigma_w^2 + \sigma_b^2}{2\pi} \arcsin\left(\frac{\sigma_w^2 + \sigma_b^2}{1 + \sigma_w^2 + \sigma_b^2}\right) + \frac{(\sigma_w^2 + \sigma_b^2)^2}{\pi(1 + \sigma_w^2 + \sigma_b^2)\sqrt{1 + 2(\sigma_w^2 + \sigma_b^2)}}. \quad (173)$$

836 One can then combine those results to find  $\chi_{\mathcal{J}}^l$

$$\chi_{\mathcal{J}}^l = \frac{\sigma_w^2 (1 + \sigma_w^2 + \sigma_b^2) \left[ \pi + 2 \arcsin\left(\frac{\sigma_w^2 + \sigma_b^2}{1 + \sigma_w^2 + \sigma_b^2}\right) + \frac{2(\sigma_w^2 + \sigma_b^2)(3 + 5(\sigma_w^2 + \sigma_b^2))}{(1 + \sigma_w^2 + \sigma_b^2)(1 + 2(\sigma_w^2 + \sigma_b^2))^{\frac{3}{2}}} \right]}{\pi(\sigma_w^2 + \sigma_b^2)(1 + \sigma_w^2 + \sigma_b^2) - 2(\sigma_w^2 + \sigma_b^2)^2 + \frac{4(\sigma_w^2 + \sigma_b^2)^2}{\sqrt{1 + 2(\sigma_w^2 + \sigma_b^2)}} + 2(\sigma_w^2 + \sigma_b^2)(1 + \sigma_w^2 + \sigma_b^2) \arcsin\left(\frac{\sigma_w^2 + \sigma_b^2}{1 + \sigma_w^2 + \sigma_b^2}\right)}.\quad (174)$$

837 The critical line defined by  $\chi_{\mathcal{J}}^l = 1$ , one can numerically solve it by scanning over  $\sigma_b$  and  $\sigma_w$ .

#### 838 J.6 Residual Connections

839 The recurrence relation for the NNGP kernel is

$$\mathcal{K}^{l+1} = \left[ \frac{\mathcal{K}^l}{4} + \frac{\mathcal{K}^l}{2\pi} \arcsin\left(\frac{\mathcal{K}^l}{1 + \mathcal{K}^l}\right) + \frac{(\mathcal{K}^l)^2}{\pi(1 + \mathcal{K}^l)\sqrt{1 + 2\mathcal{K}^l}} \right] \sigma_w^2 + \sigma_b^2 + \mu^2 \mathcal{K}^l. \quad (175)$$

840 Fixed point exists if

$$\chi_{\mathcal{K}}^* = \frac{\sigma_w^2}{4} + \frac{\sigma_w^2}{2\pi} \left[ \arcsin\left(\frac{\mathcal{K}^*}{1 + \mathcal{K}^*}\right) + \frac{4(\mathcal{K}^*)^3 + 11(\mathcal{K}^*)^2 + 5\mathcal{K}^*}{(1 + \mathcal{K}^*)^2(1 + 2\mathcal{K}^*)^{\frac{3}{2}}} \right] + \mu^2 \leq 1. \quad (176)$$



841 The recurrence coefficient for Jacobian is

$$\chi_{\mathcal{J}}^* = \frac{\sigma_w^2}{4} + \frac{\sigma_w^2}{2\pi} \left[ \arcsin \left( \frac{\mathcal{K}^*}{1 + \mathcal{K}^*} \right) + \frac{\mathcal{K}^*(3 + 5\mathcal{K}^*)}{(1 + \mathcal{K}^*)(1 + 2\mathcal{K}^*)^{\frac{3}{2}}} \right] + \mu^2. \quad (177)$$

842 Phase boundary is shifted

$$\sigma_w = 2\sqrt{1 - \mu^2} \left[ 1 + \frac{2\mathcal{K}^*(3 + 5\mathcal{K}^*)}{\pi(1 + \mathcal{K}^*)(1 + 2\mathcal{K}^*)^{\frac{3}{2}}} + \frac{2}{\pi} \arcsin \left( \frac{\mathcal{K}^*}{1 + \mathcal{K}^*} \right) \right]^{-\frac{1}{2}}, \quad (178)$$

$$\sigma_b = \frac{\mathcal{K}^*}{\sqrt{2\pi}(1 + 2\mathcal{K}^*)^{\frac{3}{4}}} \sigma_w. \quad (179)$$

843 One can again scan over  $\mathcal{K}^*$  to draw the critical line.

844 In order to locate critical point, we further require  $\chi_{\mathcal{K}}^* = 1$ . To locate the critical point, we solve

845  $\chi_{\mathcal{J}}^* - \chi_{\mathcal{K}}^* = 0$  instead. We have

$$\frac{\sigma_w^2 [(\mathcal{K}^*)^3 - 3(\mathcal{K}^*)^2 - 2\mathcal{K}^*]}{2\pi(1 + \mathcal{K}^*)^2(1 + 2\mathcal{K}^*)^{\frac{3}{2}}} = 0, \quad (180)$$

846 which has two non-negative solutions out of three

$$\mathcal{K}^* = 0 \text{ and } \mathcal{K}^* = \frac{3 + \sqrt{17}}{2}. \quad (181)$$

847 One can then solve  $\sigma_b$  and  $\sigma_w$  by plugging corresponding  $\mathcal{K}^*$  values.

$$(\sigma_w, \sigma_b) = (2\sqrt{1 - \mu^2}, 0), \text{ for } \mathcal{K}^* = 0, \quad (182)$$

$$(\sigma_w, \sigma_b) \approx (1.408\sqrt{1 - \mu^2}, 0.416\sqrt{1 - \mu^2}), \text{ for } \mathcal{K}^* = \frac{3 + \sqrt{17}}{2}. \quad (183)$$

## 848 J.7 Residual Connections with LayerNorm on Preactivations (Pre-LN)

849 Use lemma C.9 and results we had without residue connections for GELU.

$$\begin{aligned} \chi_{\mathcal{J}}^* &= \lim_{l \rightarrow \infty} \left( \frac{\sigma_w^2}{N_l \mathcal{K}^l} \sum_{k=1}^{N_l} \mathbb{E}_{\theta} \left[ \phi'(\tilde{h}_k^l) \phi'(\tilde{h}_k^l) \right] \right) \Big|_{\tilde{\mathcal{K}}^{l-1}=1} + \mu^2 \\ &= \frac{\sigma_w^2 (6\pi + 4\sqrt{3})(1 - \mu^2)}{\sigma_w^2 (6\pi + 3\sqrt{3}) + 18\pi\sigma_b^2} + \mu^2 \\ &= 1 - \frac{(\sqrt{3}\sigma_w^2 - 18\pi\sigma_b^2)(1 - \mu^2)}{\sigma_w^2 (6\pi + 3\sqrt{3}) + 18\pi\sigma_b^2}. \end{aligned} \quad (184)$$

850 The critical line is then at

$$\begin{aligned} \sigma_b &= \left( 6\sqrt{3}\pi \right)^{-\frac{1}{2}} \sigma_w \\ &\approx 0.175\sigma_w, \end{aligned} \quad (185)$$

851 just like without residue connections.

## 852 K Additional Experimental Results

853 In the following training results, we used NTK parameterization for the linear layers in the MLP. We  
854 emphasize that this choice has little effect on the training and convergence in this case, compared to  
855 standard initialization.

856 In figure 8, we compare the performance of deep MLP networks with and without LayerNorm. We  
857 note that the case with LayerNorm applied to preactivations continues to train at very large value  
858 of  $\sigma_w^2$ . In all cases, networks are trained using stochastic gradient descent with MSE. We used the  
859 Fashion MNIST dataset[47]. All networks had depth  $L = 50$  and width  $N_l = 500$ . The learning  
860 rates were logarithmically sampled

- within  $(10^{-8}, 10^6)$  for ReLU,  $(10^{-5}, 10)$  for LN-ReLU and ReLU-LN;
- within  $(10^{-5}, 1)$  for erf, LN-erf and erf-LN;
- within  $(10^{-8}, 10)$  for GELU,  $(10^{-3}, 10)$  for LN-GELU and GELU-LN, where  $\lambda_{\max}$  is the largest eigenvalue of NTK for each  $\sigma_w$ .

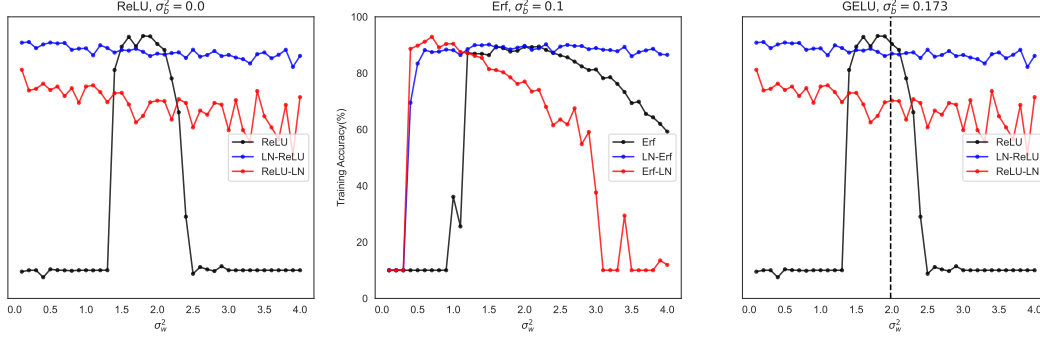

Figure 8: Performance of deep MLP networks at and away from criticality, with and without LayerNorm. The blue plateau, corresponding to LayerNorm applied to preactivations, continues to train at very large values of  $\sigma_w^2$  without the need to tune the learning rate.

In figure 9, we showed empirically that the critical exponent of partial Jacobians are vanished for erf with LayerNorm.

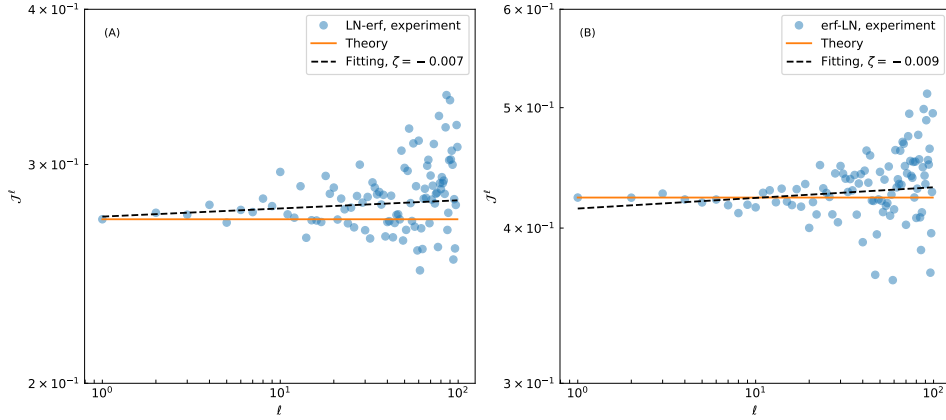

Figure 9: log-log plot of partial Jacobian  $J^{0,l}$  vs.  $l$  for (A) LN-erf and (B) erf-LN.

In figure 10, we tested  $6k$  samples from CIFAR-10 dataset[23] with kernel regression based on neural tangents library [35] [26] [36]. Test accuracy from kernel regression reflects the trainability (training accuracy) with SGD in ordered phase. We found that the trainable depth is predicted by the correlation length  $c\xi$  with LayerNorm applied to preactivations, where the prefactor  $c = 28$ . The prefactor we had is the same as vanilla cases in [49]. The difference is from the fact that they used  $\log_{10}$  and we used  $\log_e$ .

In figure 11, we explore the broad range in  $\sigma_w^2$  of the performance of MLP network with erf activation function and LayerNorm on preactivations. The network has depth  $L = 50$  and width  $N_l = 500$ ; and is trained using SGD on Fashion MNIST. The learning rates are chosen based on a logarithmic scan with a short training time.

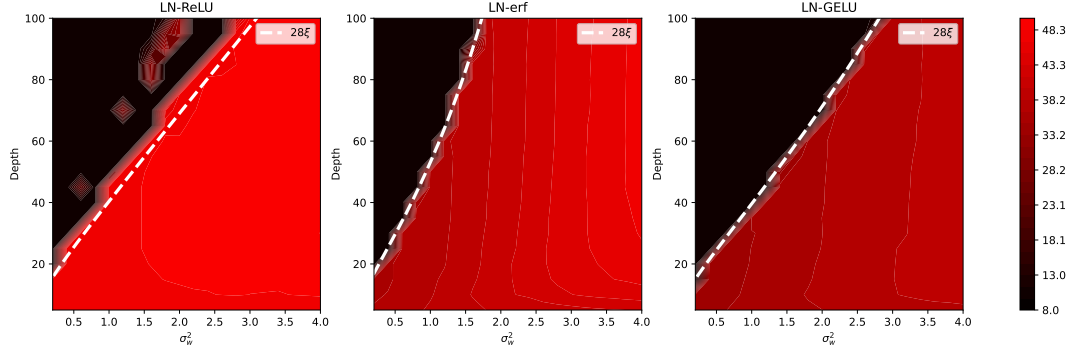

Figure 10: Test accuracy for LayerNorm applied to preactivations.  $\sigma_b^2 = 0.5$  for all cases. Correlation lengths calculated using analytical results of  $\chi_{\mathcal{J}}^l$ .

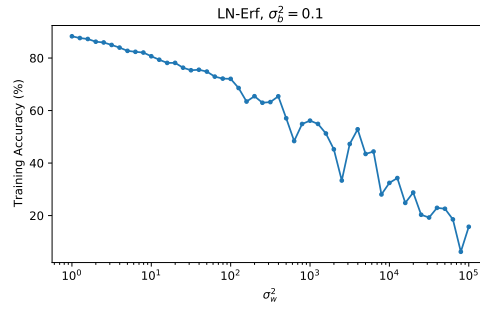

Figure 11: Training performance of MLP networks with erf activation function; and LayerNorm applied to preactivations. It continues to train for several orders of magnitude of  $\sigma_w^2$  (with learning-rate tuning).
